1 **Sexual Dichromatism Drives Diversification Within a Major Radiation of African**  
2 **Amphibians**

3  
4 Daniel M. Portik<sup>1,2\*</sup>, Rayna C. Bell<sup>2,3</sup>, David C. Blackburn<sup>4</sup>, Aaron M. Bauer<sup>5</sup>, Christopher D.  
5 Barratt<sup>6,7,8</sup>, William R. Branch<sup>9,10</sup>, Marius Burger<sup>11,12</sup>, Alan Channing<sup>13</sup>, Timothy J. Colston<sup>14,15</sup>,  
6 Werner Conradie<sup>9,16</sup>, J. Maximillian Dehling<sup>17</sup>, Robert C. Drewes<sup>18</sup>, Raffael Ernst<sup>19,20</sup>, Eli  
7 Greenbaum<sup>21</sup>, Václav Gvoždík<sup>22,23</sup>, James Harvey<sup>24</sup>, Annika Hillers<sup>25,26</sup>, Mareike Hirschfeld<sup>25</sup>,  
8 Gregory F.M. Jongsma<sup>4</sup>, Jos Kielgast<sup>27</sup>, Marcel T. Kouete<sup>4</sup>, Lucinda P. Lawson<sup>28,29</sup>, Adam D.  
9 Leaché<sup>30</sup>, Simon P. Loader<sup>31</sup>, Stefan Lötters<sup>32</sup>, Arie van der Meijden<sup>33</sup>, Michele Menegon<sup>34</sup>,  
10 Susanne Müller<sup>32</sup>, Zoltán T. Nagy<sup>35</sup>, Caleb Ofori-Boateng<sup>36</sup>, Annemarie Ohler<sup>37</sup>, Theodore J.  
11 Papenfuss<sup>2</sup>, Daniela Röbber<sup>32</sup>, Ulrich Sinsch<sup>17</sup>, Mark-Oliver Rödel<sup>25</sup>, Michael Veith<sup>32</sup>, Jens  
12 Vindum<sup>18</sup>, Ange-Ghislain Zassi-Boulou<sup>38</sup>, and Jimmy A. McGuire<sup>2</sup>

13  
14 <sup>1</sup>*Department of Ecology and Evolutionary Biology, University of Arizona, Tucson, Arizona*  
15 *85721 USA*

16 <sup>2</sup>*Museum of Vertebrate Zoology, University of California, Berkeley, California 94720, USA*

17 <sup>3</sup>*Department of Vertebrate Zoology, National Museum of Natural History, Smithsonian*

18 *Institution, Washington, DC 20560-0162 USA*

19 <sup>4</sup>*Florida Museum of Natural History, University of Florida, Gainesville, Florida 32611, USA*

20 <sup>5</sup>*Department of Biology, Villanova University, 800 Lancaster Avenue, Villanova, Pennsylvania*  
21 *19085, USA*

22 <sup>6</sup>*Department of Environmental Sciences, University of Basel, Basel 4056, Switzerland*

- 23 <sup>7</sup>*German Centre for Integrative Biodiversity Research (iDiv) Halle-Jena-Leipzig, 0413 Leipzig,*  
24 *Germany*
- 25 <sup>8</sup>*Max Planck Institute for Evolutionary Anthropology, 0413 Leipzig, Germany*
- 26 <sup>9</sup>*Port Elizabeth Museum, P.O. Box 11347, Humewood 6013, South Africa*
- 27 <sup>10</sup>*Department of Zoology, P.O. Box 77000, Nelson Mandela Metropolitan University, Port*  
28 *Elizabeth 6031, South Africa*
- 29 <sup>11</sup>*African Amphibian Conservation Research Group, Unit for Environmental Sciences and*  
30 *Management, North-West University, Potchefstroom 2520, South Africa*
- 31 <sup>12</sup>*Flora Fauna & Man, Ecological Services Ltd. Tortola, British Virgin Island*
- 32 <sup>13</sup>*Unit for Environmental Sciences and Management, North-West University, Potchefstroom*  
33 *2520, South Africa*
- 34 <sup>14</sup>*Department of Biological Sciences, Florida State University, Tallahassee, FL 32306, USA*
- 35 <sup>15</sup>*Zoological Natural History Museum, Addis Ababa University, Arat Kilo, Addis Ababa,*  
36 *Ethiopia*
- 37 <sup>16</sup>*School of Natural Resource Management, George Campus, Nelson Mandela University,*  
38 *George 6530, South Africa*
- 39 <sup>17</sup>*Institute of Sciences, Department of Biology, University of Koblenz-Landau, Universitätsstr. 1,*  
40 *D-56070 Koblenz, Germany*
- 41 <sup>18</sup>*California Academy of Sciences, San Francisco, California 94118, USA*
- 42 <sup>19</sup>*Museum of Zoology, Senckenberg Natural History Collections Dresden, Königsbrücker*  
43 *Landstr. 159, 01109 Dresden, Germany*
- 44 <sup>20</sup>*Department of Ecology, Technische Universität Berlin, Rothenburgstr. 12, 12165 Berlin,*  
45 *Germany*

- 46 <sup>21</sup>*Department of Biological Sciences, University of Texas at El Paso, El Paso, TX 79968, USA*
- 47 <sup>22</sup>*The Czech Academy of Sciences, Institute of Vertebrate Biology, Brno, Czech Republic*
- 48 <sup>23</sup>*National Museum, Department of Zoology, Prague, Czech Republic*
- 49 <sup>24</sup>*Pietermaritzburg, KwaZulu-Natal, South Africa*
- 50 <sup>25</sup>*Museum für Naturkunde, Leibniz Institute for Evolution and Biodiversity Science, Biodiversity*
- 51 *Dynamics, Invalidenstr. 43, 10115 Berlin, Germany*
- 52 <sup>26</sup>*Across the River – a Transboundary Peace Park for Sierra Leone and Liberia, The Royal*
- 53 *Society for the Protection of Birds, 164 Dama Road, Kenema, Sierra Leone*
- 54 <sup>27</sup>*Natural History Museum of Denmark, University of Copenhagen, Universitetsparken 15, 2100*
- 55 *Copenhagen, Denmark*
- 56 <sup>28</sup>*University of Cincinnati, Department of Biological Sciences, 614 Rieveschl Hall, Cincinnati*
- 57 *OH 45220, USA.*
- 58 <sup>29</sup>*Life Sciences, Field Museum of Natural History, 1400 S. Lake Shore Dr., Chicago IL, 60605*
- 59 *USA.*
- 60 <sup>30</sup>*Department of Biology and Burke Museum of Natural History and Culture, University of*
- 61 *Washington, Seattle, Washington, USA*
- 62 <sup>31</sup>*Life Sciences Department, Natural History Museum, London SW7 5BD, UK.*
- 63 <sup>32</sup>*Trier University, Biogeography Department, Universitätsring 15, 54295 Trier, Germany*
- 64 <sup>33</sup>*CIBIO Research Centre in Biodiversity and Genetic Resources, InBIO, Universidade do Porto,*
- 65 *Campus Agrario de Vairão, Rua Padre Armando Quintas, No. 7, 4485-661 Vairão, Vila do*
- 66 *Conde, Portugal*
- 67 <sup>34</sup>*Tropical Biodiversity Section, Science Museum of Trento, Corso del lavoro e della Scienza 3,*
- 68 *38122 Trento, Italy*

69 <sup>35</sup>*Royal Belgian Institute of Natural Sciences, OD Taxonomy and Phylogeny, Rue Vautier 29, B-*  
70 *1000 Brussels, Belgium*

71 <sup>36</sup>*Forestry Research Institute of Ghana, P.O. Box 63, Fumesua, Kumasi, Ghana*

72 <sup>37</sup>*Muséum National d'Histoire Naturelle, Département Origines et Evolution, UMR 7205 ISYEB,*  
73 *25 rue Cuvier, 75005 Paris, France*

74 <sup>38</sup>*Institut National de Recherche en Sciences Exactes et Naturelles, BP 2400 Brazzaville,*  
75 *République du Congo*

76

77 \*Corresponding author: Daniel M. Portik; [danielportik@email.arizona.edu](mailto:danielportik@email.arizona.edu)

78

79 **ABSTRACT**

80 Theory predicts that sexually dimorphic traits under strong sexual selection, particularly those  
81 involved with intersexual signaling, can accelerate speciation and produce bursts of  
82 diversification. Sexual dichromatism (sexual dimorphism in color) is widely used as a proxy for  
83 sexual selection and is associated with rapid diversification in several animal groups, yet studies  
84 using phylogenetic comparative methods to explicitly test for an association between sexual  
85 dichromatism and diversification have produced conflicting results. Sexual dichromatism is rare  
86 in frogs, but it is both striking and prevalent in African reed frogs, a major component of the  
87 diverse frog radiation termed Afrobatrachia. In contrast to most other vertebrates, reed frogs  
88 display female-biased dichromatism in which females undergo color transformation, often  
89 resulting in more ornate coloration in females than in males. We produce a robust phylogeny of  
90 Afrobachia to investigate the evolutionary origins of sexual dichromatism in this radiation and  
91 examine whether the presence of dichromatism is associated with increased rates of net

92 diversification. We find that sexual dichromatism evolved once within hyperoliids and was  
93 followed by numerous independent reversals to monochromatism. We detect significant  
94 diversification rate heterogeneity in Afrobatrachia and find that sexually dichromatic lineages  
95 have double the average net diversification rate of monochromatic lineages. By conducting trait  
96 simulations on our empirical phylogeny, we demonstrate our inference of trait-dependent  
97 diversification is robust. Although sexual dichromatism in hyperoliid frogs is linked to their  
98 rapid diversification and supports macroevolutionary predictions of speciation by sexual  
99 selection, the function of dichromatism in reed frogs remains unclear. We propose that reed frogs  
100 are a compelling system for studying the roles of natural and sexual selection on the evolution of  
101 sexual dichromatism across both micro- and macroevolutionary timescales.

102

103

104 **KEYWORDS**

105 Anura, Afrobatrachia, diversification, color evolution, macroevolution, sexual selection

106

107 **INTRODUCTION**

108 In *The Descent of Man and Selection in Relation to Sex*, Darwin (1871) observed that many  
109 closely related taxa differed primarily in secondary sexual characters and suggested that sexual  
110 selection plays a role in the diversification of species. The concept of speciation through sexual  
111 selection was later developed into a theory that links the coevolution of secondary sexual traits  
112 and mating preferences to premating reproductive isolation (Lande 1981, 1982; Kirkpatrick  
113 1982; West-Eberhard 1983). This conceptual framework predicts that both the strength of sexual  
114 selection and the prevalence of sexually selected traits have a positive association with speciation  
115 rate (Lande 1981, 1982; West-Eberhard 1983; Barraclough et al. 1995). If divergence in  
116 secondary sexual characters and sexual selection are indeed major drivers of speciation, then  
117 clades exhibiting elaborate sexually dimorphic traits and/or elevated sexual selection should  
118 display higher species richness and increased diversification rates at macroevolutionary scales.  
119 Empirically, these predictions have mixed support across a range of sexually dimorphic traits  
120 that serve as proxies for sexual selection (reviewed in Kraaijeveld et al. 2011), indicating that  
121 macroevolutionary trends for traits involved with intersexual signaling and mate-choice may  
122 differ from those more strongly influenced by intrasexual or natural selection. For example, traits  
123 under ecological selection such as body size dimorphism have no consistent relationship with  
124 diversification (Kraaijeveld et al. 2011), whereas sexual dichromatism, a form of sexual  
125 dimorphism in which the sexes differ in color, often functions as a mate recognition signal and is  
126 associated with diversification in several taxonomic groups (Misof 2002; Stuart-Fox & Owens  
127 2003; Alfaro et al. 2009; Kazancıoğlu et al. 2009; Wagner et al. 2012). Accordingly, sexual  
128 dichromatism has become a widely used proxy for studying the effects of sexual selection on  
129 speciation rate. However, phylogenetic comparative analyses explicitly testing for an association

130 between sexual dichromatism and diversification have produced conflicting results, even in well-  
131 studied groups such as birds (Barraclough et al. 1995; Owens et al. 1999; Morrow et al. 2003;  
132 Phillimore et al. 2006; Seddon et al. 2013; Huang & Rabosky 2014) where sexual dichromatism  
133 plays an important role in signaling and mate-choice (Price 2008). Differences in methodologies  
134 and the spatial, temporal, and taxonomic scales among studies may partially explain these  
135 contrasting results. In particular, recent studies have highlighted concerns about the ability to  
136 distinguish between trait-dependent and trait-independent diversification scenarios using  
137 phylogenetic comparative methods (Rabosky & Goldberg 2015; Beaulieu & O'Meara 2016). In a  
138 broader sense, however, this disparity among studies may reflect more nuanced or novel  
139 mechanisms underlying the evolution of sexual dichromatism such that it does not consistently  
140 fit the conceptual framework of speciation by sexual selection. For instance, the striking sexual  
141 dichromatism in *Eclactus* parrots results from intrasexual competition to attract mates and  
142 intersexual differences in exposure to visual predators (Heinsohn et al. 2005). Likewise, the  
143 dynamic sexual dichromatism in frogs that form large breeding aggregations may serve to  
144 identify other competing males rather than to attract mates (Sztatecsny et al. 2012; Kindermann  
145 & Hero 2016; Bell et al. 2017b). Consequently, investigating the evolution of secondary sexual  
146 characters like dichromatism across ecologically diverse taxonomic groups is essential if we aim  
147 to generalize about the function of sexually dimorphic traits and better understand the roles of  
148 natural and sexual selection in biological diversification.

149         Secondary sexual traits are diverse and prevalent among anurans (frogs and toads), and  
150 include sexual size dimorphism, structures for acoustic signaling, nuptial pads, spines, elongated  
151 fingers, glands, and sexual dichromatism (Duellman & Trueb 1986). Sexual size dimorphism is  
152 common and occurs in >90% of species (Shine 1979; Han & Fu 2013), and body size evolution

153 of the sexes is often attributed to fecundity for females and intrasexual competition, energetic  
154 constraints, agility, and predation for males (Salthe & Duellman 1973; Wells 1977; Shine 1979;  
155 Woolbright 1983; De Lisle & Rowe 2013; Han & Fu 2013; Nali et al. 2014). Male frogs of most  
156 species produce acoustic or vibrational signals to attract females, and these signals are essential  
157 for mate recognition and relaying social information (Ryan 1980; Gerhardt 1994; Gerhardt &  
158 Huber 2002). Structures like spines and tusks, which are present in males of many species, are  
159 used in male-male combat (e.g. McDiarmid 1975) whereas the diverse assortment of glands and  
160 nuptial pads, which are widespread in male frogs, are likely involved in courtship and amplexus  
161 (Duellman & Trueb 1986). In contrast to these widespread secondary sexual characters, anuran  
162 sexual dichromatism is rare, occurring in only ~2% of frog species (Bell & Zamudio 2012; Bell  
163 et al. 2017b). Behavioral studies in a handful of frog species indicate that these sexual color  
164 differences may be subject to natural selection as well as inter- and intrasexual selection (Mann  
165 & Cummings 2009; Sztatecsny et al. 2012). Sexual selection on coloration has historically been  
166 dismissed in frogs with the assumption that communication is predominately acoustic (reviewed  
167 in Starnberger et al. 2014); however, several studies document the importance of color signals in  
168 courtship behavior and mate-choice, even in nocturnal species (Gomez et al. 2009; Gomez et al.  
169 2010; Jacobs et al. 2016; Yovanovich et al. 2017; Akopyan et al. 2018). If sexual dichromatism  
170 in frogs contributes to premating reproductive isolation, then sexually dichromatic clades may fit  
171 the conceptual framework of speciation by sexual selection and display higher species richness  
172 and increased diversification rates at macroevolutionary scales.

173         The Afrobatrachia frog radiation (Arthroleptidae, Brevicipitidae, Hemisotidae,  
174 Hyperoliidae) includes over 400 species distributed across sub-Saharan Africa that reflect much  
175 of the morphological, ecological and reproductive mode diversity present in anurans (Portik &



176 Blackburn 2016). Afrobatrachian frogs display many unusual secondary sexual characters  
177 including the hair-like skin structures of male Hairy Frogs (*Trichobatrachus*), an elongate third  
178 digit in males (up to 40% of body length in *Arthroleptis* and *Cardioglossa*), extreme body size  
179 dimorphism (*Leptopelis*, *Chrysobatrachus*, *Breviceps*), and prominent pectoral glands  
180 (*Leptopelis*) or gular glands on the male vocal sac (Hyperoliidae). Afrobatrachian frogs also have  
181 the highest incidence of sexual dichromatism among anurans, which is striking and prevalent in  
182 many hyperoliid reed frogs (*Hyperolius*, *Heterixalus*). In sexually dichromatic hyperoliids, the  
183 difference in coloration is female-biased: both sexes exhibit a consistent juvenile coloration upon  
184 metamorphosis (termed Phase J), but at the onset of maturity sex steroids trigger a color and/or  
185 color pattern change in females (Phase F) whereas males typically retain the juvenile color  
186 pattern (Fig. 1) (Schiøtz 1967; Richards 1982; Hayes 1997; Hayes & Menendez 1999). In many  
187 dichromatic reed frog species adult males can also display the Phase F coloration, but this  
188 generally occurs in lower frequency than the Phase J morph (Fig. 1) (Schiøtz 1967, 1999; Amiet  
189 2012; Kouamé et al. 2015; Portik et al. 2016a). The function of the ontogenetic color shift in  
190 female reed frogs is poorly understood (Bell & Zamudio 2012), but it may be similar to female-  
191 biased sexual dichromatism in other vertebrates, which can result from a reversal in mating  
192 system in which females compete for males (Andersson 1994) or sexual niche partitioning in  
193 which males and females use different habitats (Shine 1989; Heinsohn et al. 2005). Alternatively,  
194 distinct female color patterns in reed frogs may play a role in courtship and mate recognition at  
195 breeding sites where upwards of eight hyperoliid species congregate in a single night (Drewes &  
196 Vindum 1994; Kouamé et al. 2013; Portik et al. 2018). The link between sexual dichromatism  
197 and rapid speciation across disparate animal clades (Misof 2002; Stuart-Fox & Owens 2003;  
198 Alfaro et al. 2009; Kazancıoğlu et al. 2009; Wagner et al. 2012) demonstrates that when sexual

199 dichromatism functions primarily as an intersexual signal under strong sexual selection, there are  
200 predictable outcomes on diversification rate. Therefore, as a first step towards understanding the  
201 potential function of dichromatism in hyperoliids, including the plausibility of intersexual  
202 signaling, we aim to assess whether this trait fits the predictions of speciation by sexual selection  
203 on a macroevolutionary scale.

204         In this study, we reconstruct the evolutionary history of sexual dichromatism within  
205 Afrobatrachia and investigate whether diversification rate shifts in this continental radiation are  
206 associated with dichromatism. We produce a well-resolved species tree of Hyperoliidae from  
207 genomic data and greatly increased taxonomic sampling relative to previous studies (Wieczorek  
208 et al. 2000; Veith et al. 2009; Portik & Blackburn 2016). To explore the evolution of sexual  
209 dichromatism within the broader phylogenetic and biogeographic context of African frogs, we  
210 incorporate all published sequence data of Afrobatrachia to produce a robust, time-calibrated  
211 phylogeny. Using methods that improve the accuracy of character state reconstructions by  
212 accounting for trait and diversification rate heterogeneity (King & Lee 2015; Beaulieu &  
213 O’Meara 2016), we test the hypothesis that sexual dichromatism evolved repeatedly within  
214 Afrobatrachia (Veith et al. 2009). Finally, we estimate net diversification rates from our time-  
215 calibrated phylogeny using the hidden state speciation and extinction framework (HiSSE;  
216 Beaulieu & O’Meara 2016) and examine if diversification rate shifts occur within Afrobatrachia  
217 and if so, whether they are associated with the occurrence of sexual dichromatism. Given recent  
218 concerns raised about the ability to distinguish between trait-dependent and trait-independent  
219 diversification scenarios (Rabosky & Goldberg 2015; Beaulieu & O’Meara 2016), we assess the  
220 performance of available state-dependent diversification methods with a trait simulation study  
221 conducted using our empirical phylogeny.

222

## 223 MATERIALS & METHODS

### 224 *Species Tree Estimation of Family Hyperoliidae*

225 *Taxonomic sampling.*— We included 254 hyperoliid samples in our sequence capture experiment  
226 with multiple representatives per species when possible. Although there are 230 currently  
227 recognized hyperoliid species (AmphibiaWeb, 2018), this family is in a state of taxonomic flux  
228 with recent studies recommending both the synonymy of species names and the splitting of  
229 species complexes (Rödel et al. 2002; Rödel et al. 2003; Wollenberg et al. 2007; Rödel et al.  
230 2009; Rödel et al. 2010; Schick et al. 2010; Conradie et al. 2012; Dehling 2012; Channing et al.  
231 2013; Conradie et al. 2013; Greenbaum et al. 2013; Liedtke et al. 2014; Loader et al. 2015;  
232 Portik et al. 2016a; Bell et al. 2017a; Conradie et al. 2018). We estimate that our sampling  
233 represents approximately 143 distinct hyperoliid lineages including 12 of 17 described hyperoliid  
234 genera. The five unsampled genera are either monotypic (*Arlequinus*, *Callixalus*,  
235 *Chrysobatrachus*, *Kassinula*) or species poor (*Alexteroon*, 3 spp.). Our sampling of the  
236 remaining genera is proportional to their recognized diversity and includes several known  
237 species complexes with lineages not reflected in the current taxonomy. We also sampled  
238 outgroup species from the following families: Arthroleptidae (7 spp), Brevicipitidae (1 sp),  
239 Hemisotidae (1 sp), and Microhylidae (1 sp). Museum and locality information for all specimens  
240 is provided in Table S1.

241

242 *Sequence capture data and alignments.*— The full details of transcriptome sequencing, probe  
243 design, library preparation, sequence captures, and bioinformatics pipelines are described in  
244 Portik et al. (2016b), but here we outline major steps of the transcriptome-based exon captures.

245 We sequenced, assembled, and filtered the transcriptomes of four divergent hyperoliid species  
246 and selected 1,260 orthologous transcripts for probe design. We chose transcripts 500–850 bp in  
247 length that ranged from 5–15% average pairwise divergence. Five additional nuclear loci  
248 (*POMC*, *RAG-1*, *TYR*, *FICD* and *KIAA2013*) were also incorporated based on published  
249 sequence data (Portik & Blackburn 2016). The final marker set for probe design included 1,265  
250 genes from four species and 5060 individual sequences, with a total of 995,700 bp of target  
251 sequence. These sequences were used to design a MYbaits-3 custom bait library (MYcroarray,  
252 now Arbor Biosciences) consisting of 120 mer baits and a 2X tiling scheme (every 60 bp), which  
253 resulted in 60,179 unique baits. Transcriptomes, target sequences, and probe designs are  
254 available on Dryad (Portik et al. 2016c).

255 Genomic DNA was extracted using a high-salt extraction method (Aljanabi & Martinez  
256 1997) and individual genomic libraries were prepared following Meyer & Kircher (2010) with  
257 modifications described in Portik et al. (2016b). Samples were pooled for capture reactions based  
258 on phylogenetic relatedness, and the combined postcapture libraries were sequenced on three  
259 lanes of an Illumina HiSeq2500 with 100 bp paired-end reads. Raw sequence data were cleaned  
260 following Singhal (2013) and Bi et al. (2012), and the cleaned reads of each sample were *de*  
261 *novo* assembled, filtered, and mapped as described in Portik et al. (2016b). The final filtered  
262 assemblies were aligned using MAFFT (Kato et al. 2002, 2005; Kato & Standley 2013) and  
263 trimmed using TRIMAL (Capella-Gutierrez et al. 2009). We enforced additional post-processing  
264 filters for alignments, including a minimum length of 90 bp and a maximum of 30% total  
265 missing data across an alignment, resulting in 1,047 exon alignments totaling 561,180 bp.

266

267 *Species tree estimation.*— We used the sequence capture data set to estimate a species tree for

268 Hyperoliidae using ASTRAL-III (Mirarab et al. 2014; Mirarab & Warnow 2015; Zhang et al.  
269 2017), which uses unrooted gene trees to estimate the species tree. This method employs a  
270 quartet-based approach that is consistent under the multi-species coalescent process, and  
271 therefore appropriate for resolving gene tree discordance resulting from incomplete lineage  
272 sorting (Mirarab et al. 2014; Mirarab & Warnow 2015). This approach also allows for missing  
273 taxa in alignments, which were present in our sequence capture data and are problematic for  
274 other coalescent-based summary methods such as MP-EST (Liu et al. 2010). We kept samples  
275 with the most complete sequence data to collapse the alignments to a single representative per  
276 lineage and generated unrooted maximum likelihood (ML) gene trees with 200 bootstrap  
277 replicates for each locus using RAxML v8 (Stamatakis 2014) under the GTRCAT model. The set  
278 of 1,047 gene trees was used to infer a species tree with ASTRAL-III, and node support was  
279 assessed with 1) quartet support values, or local posterior probabilities computed from gene tree  
280 quartet frequencies, which also allows the calculation of branch lengths in coalescent units  
281 (Sayyari & Mirarab 2016), and 2) 200 replicates of multi-locus bootstrapping, where each of the  
282 200 RAxML bootstrap trees per locus are used to infer a species tree and a greedy consensus tree  
283 is created from the 200 species trees to calculate percent support across nodes (Seo 2008).

284

### 285 *Evolutionary Relationships of Afrobatrachian Frogs*

286 *DNA barcoding.*— We obtained sequence data from the mitochondrial marker 16S ribosomal  
287 RNA (*16S*) for all samples included in the sequence capture experiment and for additional  
288 species we were unable to include in our sequence capture experiment due to insufficient DNA  
289 yield. Polymerase chain reactions (PCRs) were carried out in 12.5  $\mu$ l volumes consisting of:  
290 1.25  $\mu$ l Roche 10x (500 mM Tris/HCl, 100 mM KCl, 50 mM (NH<sub>4</sub>)<sub>2</sub> SO<sub>4</sub>, 20 mM MgCl<sub>2</sub>,

291 pH = 8.3), 0.75  $\mu$ l 25 mM MgCl<sub>2</sub>, 0.75  $\mu$ l 2 mM dNTPs, 0.25  $\mu$ l 10.0  $\mu$ M forward primer, 0.25  $\mu$ l  
292 10.0  $\mu$ M reverse primer, 8.40  $\mu$ l H<sub>2</sub>O, 0.10  $\mu$ l Taq, and 0.75  $\mu$ l DNA. Amplification involved  
293 initial denaturation at 94°C for 4 min, followed by 35 cycles of 95°C for 60 s, 51°C for 60 s,  
294 72°C for 90 s, and a final extension at 72°C for 7 min, using the primer pairs 16SA and 16SB  
295 (Palumbi et al. 1991). The PCR amplifications were visualized on an agarose gel, cleaned using  
296 ExoSAP-IT, and sequenced using BigDye v3.1 on an ABI3730 sequencer (Applied Biosystems).  
297 Newly generated sequences are deposited in GenBank (Accession numbers: **XXXXXX**).

298  
299 *GenBank data.*— To expand our taxonomic sampling we included all available published  
300 sequence data of Afrobatrachian frogs. We built a molecular data matrix using the five nuclear  
301 loci included in our captures (*FICD*, *KIAA2013*, *POMC*, *TYR*, and *RAG-1*) and the mtDNA  
302 marker *16S*. This resulted in the inclusion of 30 additional hyperoliids and 130 arthroleptid,  
303 brevicipitid, and hemisotid species, though many are represented solely by *16S* mtDNA data.  
304 Nuclear loci were aligned using MUSCLE (Edgar 2004), and *16S* sequences were aligned using  
305 MAFFT with the E-INS-i strategy (Kato et al. 2002; Kato et al. 2005). The final concatenated  
306 alignment of the expanded taxonomic data set consisted of 283 taxa and 3,991 bp, with 36% total  
307 missing data.

308  
309 *Phylogenetic methods and divergence dating analyses.*— We reconstructed the phylogenetic  
310 relationships of Afrobatrachian frogs from the five nuclear gene and mtDNA data set using a  
311 maximum likelihood (ML) approach in RAXML v8 (Stamatakis 2014). To preserve the  
312 relationships inferred with our species tree analyses of sequence capture loci, the sequence  
313 capture hyperoliid species tree containing 153 taxa (143 ingroup and 10 outgroup taxa) was used

314 as a partial constraint tree for the ML analysis of the 283-taxon alignment of six loci. A  
315 preliminary step for our divergence dating analyses in BEAST v1.8.1 (Drummond et al. 2012)  
316 involved transforming the ML Afrobatrachian frog tree to an ultrametric tree, and for this we  
317 used penalized likelihood with the ‘chronopl’ function of APE (Sanderson 2002; Paradis et al.  
318 2004), setting age bounds to allow divergence times to be compatible with our BEAST calibration  
319 priors. We performed analyses using a fixed ultrametric starting tree topology by removing  
320 relevant operators acting on the tree model. We used four secondary calibration points with  
321 normal distributions to constrain the most recent common ancestors (MRCAs) of Afrobatrachia  
322 to 80 Ma  $\pm$  5 SD, (Hemisotidae + Brevicipitidae) to 50 Ma  $\pm$  5 SD, Arthroleptidae to 40 Ma  $\pm$  5  
323 SD, and Hyperoliidae to 40 Ma  $\pm$  5 SD, based on published age estimates of Afrobatrachian  
324 frogs (Roelants et al. 2007; Kurabayashi & Masayuki 2013; Loader et al. 2014; Portik &  
325 Blackburn 2016). We used the Yule model of speciation as the tree prior, applied an uncorrelated  
326 relaxed lognormal clock, and ran two analyses for 30,000,000 generations sampling every 3,000  
327 generations. Runs were assessed using TRACER v1.5.0 (Rambaut et al. 2013) to examine  
328 convergence, and a maximum clade credibility tree with median heights was created from 7,500  
329 trees after discarding a burn-in of 2,500 trees.

330

### 331 *Evolution of Sexual Dichromatism and State-Dependent Diversification*

332 We scored the presence or absence of sexual dichromatism for hyperoliid species in our data set  
333 from multiple sources, including publications (Schj tzt 1967, 1999; Channing 2001; Channing &  
334 Howell 2006; Wollenberg et al. 2007; R del et al. 2009; Veith et al. 2009; Amiet 2012; Bell &  
335 Zamudio 2012; Channing et al. 2013; Conradie et al. 2013; Portik et al. 2016a), examination of  
336 museum specimens (Portik 2015), and the collective field observations from all authors. A

337 species was considered sexually dichromatic if adult females and adult males exhibit distinct  
338 color patterns (Phase F and Phase J, respectively), which also includes species with variation in  
339 male color phase (males display Phase J and Phase F). A summary of the sexual dichromatism  
340 data is provided in Table S2.

341 We reconstructed the evolution of sexual dichromatism on the time-calibrated phylogeny  
342 of Afrobatrachia using Bayesian ancestral state reconstruction in BEAST (Drummond et al. 2012),  
343 and also with hidden state speciation and extinction analyses using the R package HISSE  
344 (Beaulieu & O’Meara 2016) (described below). We performed Bayesian ancestral state  
345 reconstructions using several combinations of clock and character models in BEAST v1.8.1  
346 (Drummond et al. 2012) following King and Lee (2015). The topology and branch lengths were  
347 fixed by removing all tree operators, and sexual dichromatism was treated as a binary alignment.  
348 Because all outgroup families are monochromatic, we fixed the root state by adding a  
349 placeholder monochromatic taxon to the root with a zero branch length, creating a hard prior  
350 distribution on the root where  $P(\text{monochromatic root}) = 1$ , and  $P(\text{dichromatic root}) = 0$ . A  
351 stochastic Mk model of character evolution (Lewis 2001) was used with symmetrical (Mk1) or  
352 asymmetrical (Mk2) transition rates between states, and each character model was analyzed  
353 using a strict clock model (enforcing a homogenous trait rate) and a random local clock model  
354 (allowing for heterotachy), resulting in four analysis combinations. The analyses involving the  
355 random local clock allowed estimation of the number and magnitude of rate changes using  
356 MCMC. All analyses were run for 200 million generations with sampling every 20,000  
357 generations, resulting in 10,000 retained samples. We used the marginal likelihood estimator  
358 with stepping stone sampling, with a chain length of 1 million and 24 path steps, to estimate the  
359 log marginal likelihood of each run (Baele et al. 2012, 2013). We performed five replicates per



360 analysis to ensure consistency in the estimated log marginal likelihood, and subsequently  
361 compared the four different analyses using log Bayes factors, calculated as the difference in log  
362 marginal likelihoods, to select the best fit clock model and character model combination. We  
363 summarized transitions between character states and created consensus trees to estimate the  
364 posterior probabilities of a character states across nodes.

365         We performed hidden state speciation and extinction (HiSSE) analyses using the R  
366 package HISSE (Beaulieu & O’Meara 2016) to identify if sexual dichromatism in Afrobatrachian  
367 frogs is associated with increased diversification rates, and to reconstruct ancestral states while  
368 accounting for transition rate and diversification rate heterogeneity. The HiSSE model builds  
369 upon the popular binary-state speciation and extinction (BiSSE) model (Maddison et al. 2007) by  
370 incorporating ‘hidden states’ representing unmeasured traits that could impact the diversification  
371 rates estimated for states of the observed trait. The HiSSE model is therefore able to account for  
372 diversification rate heterogeneity that is not linked to the observed trait, while still identifying  
373 trait-dependent processes. The HiSSE framework also includes a set of null models that  
374 explicitly assume the diversification process is independent from the observed trait, without  
375 constraining diversification rates to be homogenous across the tree. The inclusion of these  
376 character-independent models circumvents a significant problem identified in the BiSSE  
377 framework, in which the simple ‘null’ model of constant diversification rates is typically rejected  
378 in favor of trait-dependent diversification when diversification rate shifts unrelated to the trait  
379 occur in the phylogeny (Rabosky & Goldberg 2015; Beaulieu & O’Meara 2016). The improved  
380 character-independent diversification models, referred to as CID-2 and CID-4, contain the same  
381 number of diversification rate parameters as the BiSSE and HiSSE models, respectively. We fit  
382 26 different models to our sexual dichromatism data set (Table 1): six represent BiSSE-like

383 models, four are variations of the CID-2 model, five are variations of the CID-4 model, nine are  
384 various HiSSE models with two hidden states, and two are HiSSE models with a single hidden  
385 state. Within each of these classes, the models vary mainly in the number of distinct transition  
386 rates ( $q$ ), extinction fraction rates ( $\epsilon$ ), and net turnover rates ( $\tau$ ), and the most complex HiSSE  
387 model includes four net turnover rates, four extinction fraction rates, and eight distinct transition  
388 rates. We enforced a monochromatic root state for all models and evaluated the fit of the 26  
389 models using AIC scores,  $\Delta$ AIC scores, and Akaike weights ( $\omega_i$ ) (Burnham & Anderson 2002).  
390 From the best-fit model, we estimated confidence intervals for relevant parameters and  
391 transformed  $\epsilon$  and  $\tau$  to obtain speciation ( $\lambda$ ), extinction ( $\mu$ ), and net diversification rates using the  
392 ‘SupportRegion’ function in HiSSE (Beaulieu & O’Meara 2016). We performed ancestral state  
393 estimations for each of the 26 models using the marginal reconstruction algorithm implemented  
394 in the ‘MarginRecon’ function of HiSSE, again enforcing a monochromatic root state. Our final  
395 estimation and visualization of diversification rates and node character states on the  
396 Afrobatrachian phylogeny took model uncertainty into account by using the model averaging  
397 approach described by Beaulieu and O’Meara (2016), such that model contributions to rates and  
398 states were proportional to their likelihoods.

399

400 *Simulated traits and state-dependent diversification.*—The identified bias towards the detection  
401 of trait-dependent diversification in the BiSSE framework (Rabosky & Goldberg 2015; Beaulieu  
402 & O’Meara 2016) prompted us to investigate if a similar outcome would be detected in our data  
403 set, and whether the HiSSE framework could improve our ability to distinguish whether the  
404 observed states are correlated with diversification rates. One concern raised by Beaulieu and  
405 O’Meara (2016) is that neutrally evolving traits simulated on trees generated from a complex

406 heterogenous rate branching process can lead to false signals of trait-dependent diversification,  
407 signifying the HiSSE framework may be sensitive to particular types of tree shapes.

408 To evaluate the performance of these methods given our empirical tree topology, we  
409 simulated neutrally evolving traits on the Afrobatrachian frog phylogeny and tested for trait-  
410 dependent diversification using both the BiSSE and HiSSE frameworks. We conducted  
411 independent simulations of a binary trait with the ‘sim.history’ function in R package PHYTOOLS  
412 (Revell 2012), using the unequal rates  $q$ -matrices obtained from our empirical data, enforcing a  
413 root state of trait absence. We required a minimum of 10% of taxa to exhibit the derived state  
414 and conducted simulations until we obtained 1,500 replicates meeting this criterion. We used  
415 maximum likelihood to fit a BiSSE model and the typical ‘null’ model with equal speciation and  
416 extinction rates to each simulated trait using the R package DIVERSITREE (Maddison et al. 2007;  
417 FitzJohn et al. 2009; FitzJohn 2012). We performed likelihood ratio tests and calculated  $\Delta$ AIC  
418 scores to determine if the constraint model could be rejected with confidence ( $\Delta$ AIC > 2 or p-  
419 value < 0.05), and summarized the number of instances each of the two models was favored  
420 across the simulations. We analyzed the simulated data in the HiSSE framework as with our  
421 empirical data, but with a reduced set of five models representing each major category of model.  
422 This reduced model set included two BiSSE-like models that differed only in the constraint of  $\tau$ ,  
423 a CID-2 and CID-4 model, and a HiSSE model with two hidden states, three transition rates,  
424 equal  $\tau$ , and distinct  $\tau$ . We set a probability of one for trait absence at the root state to match the  
425 manner in which traits were simulated and evaluated the fit of the 5 models using  $\Delta$ AIC scores  
426 and Akaike weights ( $\omega_i$ ) for each simulation, using a threshold of  $\Delta$ AIC greater than two to favor  
427 a model. Specifically, we were interested in whether the unconstrained BiSSE-like or HiSSE  
428 models were favored, resulting in the detection of a false pattern of trait-dependent

429 diversification, or if the CID-2 or CID-4 models were selected, capturing the expected pattern  
430 where the diversification process was independent from trait evolution.

431

## 432 **RESULTS**

### 433 *Phylogenetic Relationships*

434 The sequence capture data set consisting of 1,047 loci and 561,180 bp produced a well-resolved  
435 species tree with a normalized quartet score of 0.877 and only eight of 150 nodes (5%) with  
436 quartet scores below 0.9 (Fig. S1). The multilocus bootstrapping analysis produced similar  
437 results with low support for only seven nodes, six of which also received low support in the  
438 species tree analyses (Fig. S1). The higher-level relationships recovered in the species tree are  
439 largely congruent with those recovered by Portik and Blackburn (2016), though we found strong  
440 support for a different placement of the genus *Acanthixalus* as sister to the clade containing  
441 *Semnodactylus*, *Paracassina*, *Phlyctimantis*, and *Kassina*, which together are sister to all other  
442 hyperoliids. Our improved sampling provides the first comprehensive assessment of evolutionary  
443 relationships within the speciose genera *Afrixalus* and *Hyperolius*. The monophyly of *Hyperolius*  
444 is supported, however *Afrixalus* is paraphyletic, and we found a sister relationship between the  
445 Ethiopian-endemic *A. enseticola* and the Malagasy-Seychelles species of *Heterixalus* and  
446 *Tachycnemis*, which are in turn sister to all remaining *Afrixalus* (Fig. S1). We found strong  
447 support for the southern African species *Hyperolius semidiscus* as sister to all other lineages in  
448 the genus, and furthermore recovered *H. parkeri*, *H. lupiroensis* and the *H. nasutus* complex as  
449 sister to two larger subclades of *Hyperolius* (Clades 1 and 2; Figs. 2, S1). In an effort to  
450 distinguish the main division within Hyperoliidae, we recognize the subfamilies Kassinae  
451 Laurent, 1972 and Hyperoliinae Laurent, 1943 and define the content within each on the basis of

452 our species tree analysis as follows: 1) Kassiniinae: *Acanthixalus*, *Kassina*, *Paracassina*,  
453 *Phlyctimantis*, and *Semnodactylus*, 2) Hyperoliinae: *Afrixalus*, *Cryptothylax*, *Heterixalus*,  
454 *Hyperolius*, *Morerella*, and *Opisthothylax* (Fig. 2). We retain previous subfamily assignments for  
455 genera not sampled in our molecular study (Hyperoliinae: *Alexteroon*, *Arlequinus*, *Callixalus*,  
456 *Chrysobatrachus*, *Kassinula*), which should be included in future phylogenetic studies to  
457 confirm these placements.

458 The phylogenetic analyses of the Afrobatrachia supermatrix produced family-level  
459 relationships consistent with previous analyses (Pyron & Wiens 2011; Portik & Blackburn 2016;  
460 Feng et al. 2017), including a sister relationship between Hyperoliidae and Arthroleptidae, and  
461 between Hemisotidae and Brevicipitidae (Fig. S2). This expanded taxonomic data set also  
462 included improved sampling for the Malagasy hyperoliid genus *Heterixalus* and the *Hyperolius*  
463 *nasutus* complex, for which we recovered results consistent with Wollenberg et al. (2007) and  
464 Channing et al. (2013), respectively. We recovered an Eocene age for the time to most recent  
465 common ancestor (TMRCA) of the families Hyperoliidae, Arthroleptidae and Brevicipitidae, of  
466 approximately 42.4 Ma (95% HPD: 39.1–51.6 Ma), 45.4 Ma (95% HPD: 35.5–48.7 Ma), and  
467 41.8 Ma (95% HPD: 33.9–49.8 Ma) (Fig. S2). These dates are younger than previous estimates  
468 (Roelants et al. 2007; Loader et al. 2014) but are consistent with more recent multilocus analyses  
469 (Portik & Blackburn 2016; Feng et al. 2017). We found diversification events began within  
470 Hyperoliinae approximately 35.8 Ma (95% HPD: 30.1–41.6 Ma) and within Kassiniinae  
471 approximately 38.3 Ma (95% HPD: 30.9–45.6 Ma). The majority of speciation events within  
472 *Hyperolius* occurred from the late Miocene to the Plio-Pleistocene (Fig. S2).

473

474 *Evolution of Sexual Dichromatism and State-Dependent Diversification*

475 We found sexual dichromatism occurs in 60 of the 173 (34%) hyperoliid frog species included in  
476 our analyses. The Bayesian ancestral state reconstructions using four model combinations  
477 produced different patterns of character reconstructions and rates of trait evolution (Fig. S3).  
478 Overall, we found models with asymmetric character transition rates (Mk2) outperformed those  
479 with symmetric rates (Mk1), regardless of the clock model used (log-transformed Bayes factor  
480 range: 3.40–10.39; Table 2). The analysis with the highest log-marginal likelihood incorporated  
481 the relaxed local clock (RLC) Mk2 model, though it was not a significantly better fit than the  
482 simpler strict clock (SC) Mk2 model (log-transformed Bayes factor of 0.10) indicating low  
483 variation in lineage-specific evolutionary rates for this trait. The ancestral character  
484 reconstructions of the SC Mk2 indicated a median of two transitions from monochromatism to  
485 dichromatism. However, the character reconstructions revealed that this estimate is due to low  
486 posterior probability estimates for two critical nodes within Hyperoliinae (Fig. S3), and the  
487 presence of dichromatism at either one or both of these nodes would result in a single origin of  
488 sexual dichromatism. By contrast, the SC Mk2 model demonstrated approximately 27  
489 independent losses of sexual dichromatism within hyperoliids, including losses in entire groups  
490 (*Afrixalus*, *H. nasutus* complex) and numerous reversals within *Heterixalus* and *Hyperolius*  
491 (notably in Clade 2) (Fig. S4).

492 Our hidden state speciation and extinction analyses revealed that a HiSSE model with  
493 four net turnover rates, equal extinction fraction rates, and three distinct transition rates was the  
494 best-fit model (Model 19, Table 1). The second and third ranked models ( $\Delta$ AIC of 1.0, 2.5) were  
495 also HiSSE models that varied in the number of extinction fraction rates or the number of  
496 transition rates. Together these three HiSSE models accounted for 84.1% of the model weight  
497 (Table 1) and support a signal of state-dependent diversification in which sexual dichromatism

498 and a hidden state are associated with diversification rates. The net diversification rates inferred  
499 using the best-fit model were nearly twice as high in sexually dichromatic lineages (0.157) as  
500 compared to monochromatic lineages (0.091) in the absence of the hidden state (Fig. 3), and the  
501 combination of the hidden state and dichromatism or monochromatism resulted in much lower  
502 net diversification rate estimates (0.02 and <0.001, respectively). The trait reconstructions for all  
503 four state combinations indicated that the dichromatism plus hidden state combination was only  
504 present in the MRCA of two genera (*Cryptothylax*, *Morerella*) (Fig. S5), and was associated with  
505 a markedly lower diversification rate (Fig. 3). The model-averaged ancestral state  
506 reconstructions demonstrated strong support for a single origin of sexual dichromatism and 25  
507 independent reversals to monochromatism within Hyperoliinae, with reversal patterns similar to  
508 the Mk2 analyses (Figs. 2, S5).

509

510 *Simulated traits and state-dependent diversification.*—Analyzed in the BiSSE framework, we  
511 found that many of the trait simulations on the phylogeny of Afrobatrachia resulted in the  
512 rejection of the ‘null’ model of equal diversification rates across character states. Based on the  
513 significance of likelihood ratio tests, we rejected the ‘null’ model in favor of trait-dependent  
514 diversification for 565 (37.6%) of our 1500 comparisons. We recovered similar results using a  
515 delta AIC cutoff value of two, for which we found support for trait-dependent diversification in  
516 546 (36.4%) of the simulations (Fig. 4). In many of these cases we found unexpectedly strong  
517 support for the BiSSE model, and 160 (10.6%) of the comparisons resulted in delta AIC values  
518 ranging from 10–40.

519 In contrast to the BiSSE analyses, the addition of the character independent models (CID-  
520 2 and CID-4) in HiSSE dramatically reduced the detection of a false association between

521 simulated traits and diversification rates by providing appropriate null models. In addition to  
522 these two CID models, our set of five models also included two BiSSE-like models and a typical  
523 HiSSE model. Based on a delta AIC cutoff value of two, out of the 1500 analyses performed the  
524 CID-4 model was selected 1,132 times (75.4%), the HiSSE model was chosen 125 times (8.3%),  
525 and the remaining 243 analyses (16.2%) showed equivocal support ( $\Delta AIC = 0-2$ ) for either the  
526 CID-4 or HiSSE model (Fig. 5). In the cases of equivocal support, the CID-4 and HiSSE models  
527 were always the top two models, which should be interpreted as a lack of support for trait-  
528 dependent diversification. Our error rate with the HiSSE model being favored in only 8.3% of  
529 our simulations was substantially lower than the Beaulieu and O'Meara (2016) 'difficult tree'  
530 scenario in which the HiSSE model was favored in 29% of the data sets. These simulation results  
531 strongly suggest the branching pattern of our empirical phylogeny is not inherently problematic  
532 for the investigation of trait-dependent diversification using these available methods, adding  
533 support to our empirical analyses in which we detected an association between diversification  
534 rates and sexual dichromatism.

535

## 536 **DISCUSSION**

### 537 *Hyperoliid Relationships and the Origin of Sexual Dichromatism*

538 Afrobatrachian frogs account for more than half of all African amphibians and this continental  
539 radiation exhibits incredible variation in ecomorphology, reproductive mode, and other life  
540 history traits (Portik & Blackburn 2016). Within Afrobatrachia, the family Hyperoliidae is the  
541 most species-rich (~230 species) with surprisingly little diversity in ecomorphology and  
542 reproductive mode (Schjøtz 1967, 1999; Portik & Blackburn 2016), but with incredible variation  
543 in coloration and sexual dichromatism. These phenotypic characteristics have generated



544 considerable taxonomic confusion within hyperoliids (e.g. Ahl 1931), hindering a clear  
545 understanding of species diversity and the evolutionary history of this radiation. Here, we have  
546 produced the most comprehensive hyperoliid species tree to date and found support for an  
547 Eocene origin of two subfamilies representing a major division within Hyperoliidae: Kassiniinae  
548 (26 species) and Hyperoliinae (~200 species). Within Hyperoliinae, we clarified relationships  
549 within the hyperdiverse genus *Hyperolius* (~150 species), which largely consists of two clades  
550 (Figs. 2, S1, S2). These clades represent parallel rapid radiations with species distributed across a  
551 variety of habitats and altitudes throughout sub-Saharan Africa, which showcases Hyperoliidae  
552 as a rich comparative framework for future biogeographic research.

553         While both Kassiniinae and Hyperoliinae include colorful species, sexual dichromatism  
554 only occurs within Hyperoliinae where it is present in the genera *Tachycinemis*, *Cryptothylax* and  
555 *Morerella*, several species of *Heterixalus*, and more than half of the *Hyperolius* species we  
556 sampled (Fig. 2, Table S2). A previous study hypothesized that sexual dichromatism evolved  
557 multiple times within Hyperoliidae (Veith et al. 2009); however, we found overwhelming  
558 support for a single origin of sexual dichromatism (Figs. 2, S3) and over twenty independent  
559 reversals to monochromatism that range from early transitions that characterize entire genera  
560 (e.g., *Afrixalus*) to recent reversals within *Heterixalus* and *Hyperolius* (Figs. 2, S4). This  
561 transition bias from dichromatism to monochromatism also occurs in birds (Price & Birch 1996;  
562 Omland 1997; Burns 1998; Kimball et al. 2001; Hofmann et al. 2008; Dunn et al. 2015; Schultz  
563 & Burns 2017), in which secondary monochromatism can evolve as the result of a color change  
564 in either sex (Kimball & Ligon 1999; Johnson et al. 2013; Price & Eaton 2014; Dunn et al. 2015;  
565 Schultz et al. 2017). Similar transitional pathways to secondary monochromatism occur in  
566 hyperoliids, in which females may lose the ability for color transformation at sexual maturity

567 (both sexes retain the Phase J juvenile coloration) or males undergo obligatory ontogenetic color  
568 change at maturity (both sexes develop Phase F coloration) (Figs. 1, 5). Characterizing juvenile  
569 coloration across species, which is undocumented in many hyperoliids, and documenting  
570 ontogenetic color change, including the prevalence of male color phases (Portik et al. 2016a),  
571 will be essential steps toward differentiating between these two forms of monochromatism. In  
572 experimental settings, the hormone estradiol induces color transformation in both sexes in the  
573 dichromatic species *H. argus* and *H. viridiflavus*, yet the effects of testosterone differ across  
574 species (Richards 1982; Hayes & Menendez 1999) suggesting that evolutionary transitions from  
575 dichromatism to monochromatism result directly from differences in hormone sensitivities  
576 among species. Reversals to monochromatism are especially prominent in *Hyperolius* Clade 2  
577 (twelve independent events; Figs. 2, S4), highlighting the potential for future research in this  
578 group to identify the physiological basis and molecular underpinnings of these transitions. For  
579 example, three monochromatic species of the *H. cinnamomeoventris* complex that are endemic to  
580 the islands of São Tomé and Príncipe (*H. drewesi*, *H. molleri*, *H. thomensis*; both sexes with  
581 Phase F coloration) are derived from a mainland clade with sexually dichromatic (*H.*  
582 *cinnamomeoventris*, *H. olivaceus*; females Phase F, males Phase J) and monochromatic species  
583 (*H. veithi*; both sexes Phase J) (Fig. 5). Variation among these closely related species is well  
584 suited for investigating both the evolutionary and ecological contexts underlying transitions from  
585 sexual dichromatism to monochromatism.

586

### 587 *Sexual Dichromatism is Linked to Increased Diversification Rates*

588 Sexual dichromatism is an important predictor of diversification in several taxonomic groups  
589 including cichlids (Wagner et al. 2012), labrid fish (Alfaro et al. 2009; Kazancıoğlu et al. 2009),

590 agamid lizards (Stuart-Fox & Owens 2003), and dragonflies (Misof 2002); yet in birds, the  
591 relationship between dichromatism and species richness/speciation rate varies among studies that  
592 differ in methodology and evolutionary scale (Barracough et al. 1995; Owens et al. 1999;  
593 Morrow et al. 2003; Phillimore et al. 2006; Seddon et al. 2013; Huang & Rabosky 2014).  
594 Though some state-dependent speciation and extinction model sets, such as the BiSSE method,  
595 are no longer considered adequate for robustly detecting trait-dependent diversification (Rabosky  
596 & Goldberg 2015; Beaulieu & O’Meara 2016), the HiSSE method contains an expanded model  
597 set that can link diversification rate heterogeneity to observed traits, hidden traits, or character  
598 independent processes. In particular, the inclusion of appropriate null models (character-  
599 independent models) reduces the inference of trait-dependent diversification when a phylogeny  
600 contains diversification rate shifts unrelated to the focal trait (Beaulieu & O’Meara 2016). Our  
601 trait simulation study recapitulated this result (Fig. 4) while also demonstrating that the  
602 branching pattern of our afrobatrachian phylogeny is unlikely to drive false inferences of trait-  
603 dependent diversification using HiSSE (e.g., the “worst-case” scenario of Beaulieu & O’Meara  
604 2016). We found that sexually dichromatic hyperoliid lineages have nearly double the average  
605 diversification rate of monochromatic lineages, and that these diversification rates are not  
606 inflated by a hidden trait. Arboreal oviposition and an associated shift to breeding in pond  
607 systems both evolved within hyperoliids and were previously suggested as potential factors  
608 influencing diversification (Portik & Blackburn 2016). In our analyses these traits may have  
609 represented hidden factors co-distributed with dichromatism; however, the shift to the sexual  
610 dichromatism plus hidden state character combination occurred only once in the common  
611 ancestor of two genera (*Cryptothylax*, *Morerella*; Fig. S5) and is actually associated with lower  
612 diversification rates (Fig. 3), indicating that these additional traits had little impact on our

613 analyses. Together, our results demonstrate that diversification rate heterogeneity occurs within  
614 Afrobatrachia and that the origin and persistence of sexual dichromatism in hyperoliid frogs is  
615 linked to their rapid diversification across sub-Saharan Africa.

616

### 617 *How Does Sexual Dichromatism Influence Diversification Rate?*

618 Sexual dichromatism is a common proxy for sexual selection in macroevolutionary studies  
619 (reviewed in Kraaijeveld et al. 2011), especially for testing the prediction that clades with  
620 variation in secondary sexual characters under strong sexual selection exhibit higher  
621 diversification rates and species richness (Lande 1981, 1982; West-Eberhard 1983; Barraclough  
622 et al. 1995). While our trait-dependent diversification analyses strongly support a faster rate of  
623 net diversification associated with sexual dichromatism, we currently lack behavioral and natural  
624 history data in hyperoliids to establish whether sexual dichromatism is actually under strong  
625 sexual selection. At more recent timescales, speciation by sexual selection can result in a group  
626 of closely related species with high ecological similarity but differing almost exclusively in  
627 signaling traits (West-Eberhard 1983; Dominey 1984; Panhuis et al. 2001; Turelli et al. 2001;  
628 Andersson 2004; Mendelson & Shaw 2005; Ritchie 2007; Safran et al. 2013). Frogs are  
629 generally opportunistic gape-limited predators (Duellman & Trueb 1986), and in hyperoliids  
630 food partitioning is strongly dictated by body size (Luiselli et al. 2004). In one well-characterized  
631 community site, the females of seven syntopic sexually dichromatic *Hyperolius* species display  
632 minimal body size differences (Portik et al. 2018) but show exceptional divergence in color  
633 (Portik et al. 2016a). Five of these species occur in the predominantly dichromatic *Hyperolius*  
634 Clade 1, and within this clade there are typically striking interspecific color differences in  
635 females, but not males, among species (Fig. 5). This pattern of interspecific variation in

636 secondary sexual characters in the absence of ecological divergence is consistent with the  
637 predictions of speciation by sexual selection, and by inference, would imply that dichromatism in  
638 hyperoliids – specifically female color – is an essential mate recognition signal (*sensu*  
639 Mendelson & Shaw 2012). In frogs, male calls are well-established mate recognition signals that  
640 can be under strong sexual selection (Ryan 1980; Gerhardt 1994), and these acoustic signals are  
641 demonstrably important for hyperoliid frogs. Males form dense breeding aggregations and  
642 choruses (Bishop et al. 1995), calls differ between closely-related species (Schjøtz 1967, 1999;  
643 Gilbert & Bell 2018), and females prefer conspecific calls over calls of syntopic heterospecifics  
644 (Telford & Passmore 1981). However, visual displays can also serve as important courtship  
645 signals in frogs, typically in conjunction with acoustic signaling (Gomez et al. 2009; Gomez et  
646 al. 2010; Starnberger et al. 2014; Jacobs et al. 2016; Yovanovich et al. 2017; Akopyan et al.  
647 2018). Although most studies have documented female preference for male coloration, the recent  
648 discovery of female displays during nocturnal phyllomedusine treefrog courtship highlights the  
649 possibility of male mate-choice and intersexual selection of female coloration (Akopyan et al.  
650 2018). The lack of heterospecific matings among dichromatic species at high-diversity breeding  
651 sites (Portik et al. 2018) strongly suggests behavioral isolation may be linked to divergent mate  
652 recognition signals, including male call (Telford & Passmore 1981), gular gland compounds  
653 (Starnberger et al. 2013), or female coloration. Our knowledge of reproductive behavior in  
654 hyperoliids is largely based on a single dichromatic species (*H. marmoratus*; Dyson & Passmore  
655 1988; Telford & Dyson 1988; Dyson et al. 1992; Jennions et al. 1995), and as such there may be  
656 an overlooked role for mutual mate-choice in hyperoliids, in which females locate males by call  
657 and/or pheromones and males assess color patterns of approaching females.

658         Although it can be tempting to equate sexually dimorphic traits such as dichromatism

659 with sexual selection, several alternative mechanisms may also contribute to female-biased  
660 dichromatism in hyperoliids. For instance, aposematism is a widespread anti-predator  
661 mechanism in frogs that is typically accompanied by the presence of skin toxins (reviewed in  
662 Toledo & Haddad 2009; Rojas 2017), commonly alkaloids (Daly 1995). Sex-specific differences  
663 in chemical defense occur in some frogs (Saporito et al. 2010; Jeckel et al. 2015); however, both  
664 males and females of four dichromatic hyperoliids lacked alkaloids in their skin (Portik et al.  
665 2015) suggesting that either aposematism is an unlikely explanation for ornate coloration or that  
666 hyperoliids have evolved novel compounds for chemical defense. Female-biased dichromatism  
667 has also been tied to sex-role reversal in fishes and birds (Roede 1972; Oring 1982; Berglund et  
668 al. 1986a, 1986b; Eens & Pinxten 2000), in which females compete more intensely than males  
669 for access to mates. This mechanism seems unlikely for hyperoliids because males in both  
670 monochromatic and dichromatic species form dense choruses and compete intensely to attract  
671 females, often engaging in combat (Telford 1985; Backwell & Passmore 1990). Finally, sexual  
672 niche partitioning (Selander 1966; Shine 1989) can result in sexual dichromatism when the sexes  
673 use different microhabitats, and as a consequence are subject to different selective pressures and  
674 predation regimes (Heinsohn et al. 2005; Bell & Zamudio 2012). During the breeding season,  
675 male hyperoliids are exposed on calling sites and Hayes (1997) proposed that more cryptic male  
676 coloration may reduce predation pressure, a hypothesis that is consistent with greater  
677 observations of predation events on females of dichromatic species (Grafe 1997; Portik et al.  
678 2018). Quantifying differences in predation rates between the sexes, between monochromatic  
679 and dichromatic species, and between Phase F and Phase J males within dichromatic species  
680 would address whether this aspect of natural selection is also shaping the evolution of sexual  
681 dichromatism. Although these mechanisms and other differences in natural selection pressures

682 may influence the evolution of sexual dichromatism in hyperoliids, they are generally not  
683 expected to elevate rates of reproductive isolation or drive diversification rate shifts comparable  
684 to the effects of sexual selection. Therefore, we propose that hyperoliids are a compelling system  
685 for disentangling the roles of sexual selection and natural selection in the evolution of sexual  
686 dichromatism, and how these mechanisms have promoted diversification at both  
687 microevolutionary and macroevolutionary timescales.

688

689

#### 690 **ACKNOWLEDGEMENTS**

691 Laboratory work conducted by DMP was funded by a National Science Foundation DDIG  
692 (DEB: 1311006), a National Science Foundation grant (DEB: 1202609) awarded to D.C.  
693 Blackburn, an Ecological, Evolutionary, and Conservation Genomics Research Award presented  
694 by the American Genetic Association, the Museum of Vertebrate Zoology, and by R.C. Bell and  
695 J.A. McGuire. This work used the Vincent J. Coates Genomics Sequencing Laboratory at UC  
696 Berkeley, supported by NIH S10 Instrumentation Grants S10RR029668 and S10RR027303.  
697 We thank the following institutions for accessioning field collections and for facilitating loan  
698 access: California Academy of Sciences, Cornell University Museum of Vertebrates, Institut  
699 national de Recherche en Sciences Exactes et Naturelles, Museum für Naturkunde, Berlin,  
700 Muséum National d'Histoire Naturelle, Museum of Comparative Zoology, Museum of  
701 Vertebrate Zoology, National Museum, Prague, Natural History Museum, London, North  
702 Carolina Museum of Natural Sciences, Port Elizabeth Museum, Senckenberg Natural History  
703 Collections Dresden, South African Institute for Aquatic Biodiversity, South African National  
704 Biodiversity Institute, The Field Museum, Trento Museum of Science, University of Texas at El

705 Paso Biodiversity Collections, and the Zoological Natural History Museum, Addis Ababa  
706 University. All authors express thanks to the many government agencies, ministries, and  
707 departments that issued research permits and provided the access necessary to conduct their  
708 individual field work in sub-Saharan Africa.

709

710



711  
712  
713  
714  
715  
716  
717  
718  
719  
720  
721  
722  
723  
724  
725  
726  
727  
728  
729  
730  
731  
732  
733

## LITERATURE CITED

- Ahl E (1931) *Amphibia, Anura III, Polypedatidae*. Das Tierreich 55: xvi + 477.
- Akopyan M, Kaiser K, Vega A, Savant NG, Owen CY, Dudgeon SR, Robertson JM (2018) Melodic males and flashy females: geographic variation in male and female reproductive behavior in red-eyed treefrogs (*Agalychnis callidryas*). *Ethology* 124:54–64.
- Alfaro ME, Brock CD, Banbury BL, Wainwright PC (2009) Does evolutionary innovation in pharyngeal jaws lead to rapid lineage diversification in labrid fishes? *BMC Evol Biol* 9:255.
- Aljanabi S, Martinez I (1997) Universal and rapid salt-extraction of high quality genomic DNA for PCR-based techniques. *Nucleic Acids Res* 25:4692–4693.
- Amiet J-L (2012) *Les Rainettes du Cameroun (Amphibiens Anoures)*. Saint-Nazaire, France: La Nef des Livres. 591 pp.
- AmphibiaWeb (2018) Available at: [amphibiaweb.org](http://amphibiaweb.org). University of California, Berkeley. Accessed May 2018.
- Andersson M (1994) *Sexual selection*. Princeton, NJ. Princeton University Press.
- Backwell PRY, Passmore NI (1990) Aggressive interactions and intermale spacing in choruses of the leaf-folding frog, *Afrivalus delicatus*. *S Afr J Zool* 25:133–137.
- Baele G, Lemey P, Bedford T, Rambaut A, Suchard MA, Alekseyenko AV (2012) Improving the accuracy of demographic and molecular clock model comparison while accommodating phylogenetic uncertainty. *Mol Biol Evol* 29:2157–2167.
- Baele G, Li WLS, Drummond AJ, Suchard MA, Lemey P (2012) Accurate model selection of relaxed molecular clocks in Bayesian phylogenetics. *Mol Biol Evol* 30:239–243.
- Barracough TG, Harvey PH, Nee S (1995) Sexual selection and taxonomic diversity in passerine birds. *Proc R Soc Lon B* 259:211–215.

- 734 Beaulieu JM, O'Meara BC (2016) Detecting hidden diversification shifts in models of trait-  
735 dependent speciation and extinction. *Syst Biol* 65:583–601.
- 736 Bell RC, Zamudio KR (2012) Sexual dichromatism in frog: natural selection, sexual selection  
737 and unexpected diversity. *Proc R Soc Lon B* 279:4687–4693.
- 738 Bell RC, Parra JL, Badjedjea G, Barej MF, Blackburn DC, Burger M, Channing A, Dehling JM,  
739 Greenbaum E, Gvoždík V, Kielgast J, Kusamba C, Lötters S, McLaughlin PJ, Nagy ZT,  
740 Rödel M-O, Portik DM, Stuart BL, VanDerWal J, Zamudio KR (2017a) Idiosyncratic  
741 responses to climate-driven forest fragmentation and marine incursions in reed frogs from  
742 Central Africa and the Gulf of Guinea Islands. *Mol Ecol* 26:5223–5224.
- 743 Bell RC, Webster GN, Whiting MJ (2017b) Breeding biology and the evolution of dynamic  
744 sexual dichromatism in frogs. *J. Evol. Biol.* 30:2104–2115.
- 745 Berglund A, Rosenqvist G, Svensson I (1986a) Reversed sex roles and parental energy  
746 investment in zygotes of two pipefish (Syngnathidae) species. *Mar Ecol Prog Ser* 29:209–  
747 215.
- 748 Berglund A, Rosenqvist G, Svensson I (1986b) Mate choice, fecundity and sexual dimorphism in  
749 two pipefish species (Syngnathidae). *Behav Ecol Sociobiol* 19:301–307.
- 750 Bi K, Vanderpool D, Singhal S, Linderroth T, Moritz C, Good JM (2012) Transcriptome-based  
751 exon capture enables highly cost-effective comparative genomic data collection at moderate  
752 evolutionary scales. *BMC Genomics* 13:403.
- 753 Bishop PJ, Jennions MD, Passmore NI (1995) Chorus size and call intensity: female choice in  
754 the painted reed frog, *Hyperolius marmoratus*. *Behaviour* 132:721–731.
- 755 Burnham KP, Anderson DR (2002) *Model Selection and Multimodel Inference: A Practical*  
756 *Information-Theoretic Approach*. New York: Springer.

- 757 Burns K (1998) A phylogenetic perspective on the evolution of sexual dichromatism in tanagers  
758 (Thraupidae): the role of female versus male plumage. *Evolution* 52:1219–1224.
- 759 Capella-Gutierrez S, Silla-Martinez JM, Gabaldon T (2009) trimAl: a tool for automated  
760 alignment trimming in large-scale phylogenetic analyses. *Bioinformatics* 25:1972–1973.
- 761 Channing A (2001) *Amphibians of Central and Southern Africa*. Cornell University Press,  
762 Ithaca, New York, USA.
- 763 Channing A, Howell KM (2006) *Amphibians of East Africa*. Edition Chimaira, Frankfurt,  
764 Germany.
- 765 Channing A, Hillers A, Lötters S, Rödel M-O, Schick S, Conradie W, Rödder D, Mercurio V,  
766 Wagner P, Dehling JM, du Preez LH, Kielgast J, Burger M (2013) Taxonomy of the super-  
767 cryptic *Hyperolius nasutus* group of long reed frogs of Africa (Anura: Hyperoliidae), with  
768 descriptions of six new species. *Zootaxa* 3620:301–350.
- 769 Conradie W, Branch WR, Measey GJ, Tolley KA (2012) A new species of *Hyperolius* Rapp,  
770 1842 (Anura: Hyperoliidae) from the Serra da Chela mountains, south-western Angola.  
771 *Zootaxa* 3269:1–17.
- 772 Conradie W, Branch WR, Tolley KA (2013) Fifty shades of grey: giving colour to the poorly  
773 known Angolan Ashy reed frog (Hyperoliidae: *Hyperolius cinereus*), with the description of  
774 a new species. *Zootaxa* 3635:201–223.
- 775 Conradie W, Verbugt L, Portik DM, Ohler A, Bwong BA, Lawson LP (2018) A new reed frog  
776 (Hyperoliidae: *Hyperolius*) from coastal northeastern Mozambique. *Zootaxa* 4379:177–198.
- 777 Daly JW (1995) The chemistry of poisons in amphibian skin. *Chemical ecology: the chemistry of*  
778 *biotic interaction*, eds Eisner T, Meinwald J (National Academy Press, Washington, DC,  
779 USA), pp 17–28.

- 780 Darwin CR (1871) *The Descent of Man, and Selection in Relation to Sex*. London: John Murray.
- 781 Volume 1. 1st edition.
- 782 De Lisle, SP, Rowe L (2013) Correlated evolution of allometry and sexual dimorphism across  
783 higher taxa. *Am Nat* 183:630–639.
- 784 Dehling JM (2012) An African glass frog: a new *Hyperolius* species (Anura: Hyperoliidae) from  
785 Nyungwe National Park, southern Rwanda. *Zootaxa* 3391:52–64.
- 786 Dominey W (1984) Effects of sexual selection and life history on speciation: species flocks in  
787 African cichlids and Hawaiian *Drosophila*. *Evolution of Fish Species Flocks*, eds Echelle  
788 AA, Kornfield I (University of Maine Press, Orono), pp 231–249.
- 789 Drewes RC, Vindum JV (1994) Amphibians of the Impenetrable Forest, Southwest Uganda. *J*  
790 *Afr Zool* 108:55–70.
- 791 Drummond AJ, Suchard MA, Xie D, Rambaut A (2012) Bayesian phylogenetics with BEAUti  
792 and the BEAST 1.7. *Mol Biol Evol* 29:1969–1973.
- 793 Duellman WE, Trueb L (1986) *Biology of Amphibians*. McGraw-Hill. New York, USA.
- 794 Dunn PO, Armenta JK, Whittingham LA (2015) Natural and sexual selection act on different  
795 axes of variation in avian plumage color. *Sci Adv* 1:e1400155.
- 796 Dyson ML, Passmore NI (1988) Two-choice phonotaxis in *Hyperolius marmoratus* (Anura:  
797 Hyperoliidae): the effect of temporal variation in presented stimuli. *Anim Behav* 36:648–652.
- 798 Dyson ML, Passmore NI, Bishop PJ, Henzi SP (1992) Male behavior and correlates of mating  
799 success in a natural population of African painted reed frogs (*Hyperolius marmoratus*).  
800 *Herpetologica* 48:236–246.
- 801 Edgar RC (2004) MUSCLE: multiple sequence alignment with high accuracy and high  
802 throughput. *Nucl Acids Res* 32:1792–1797.

- 803 Eens M, Pinxten R (2000) Sex-role reversal in vertebrates: behavioural and endocrinological  
804 accounts. *Behav Process* 51:135–147.
- 805 Feng Y-J, Blacburn DC, Liang D, Hillis DM, Wake DB, Cannatella DC, Zhang P (2017)  
806 Phylogenomics reveals rapid, simultaneous diversification of three major clades of  
807 Gondwanan frogs at the Cretaceous-Paleogene boundary. *Proc Natl Acad Sci USA*  
808 114:E5864–E5870.
- 809 FitzJohn RG (2012) Diversitree: comparative phylogenetic analyses of diversification in R.  
810 *Methods Ecol Evol* 3:1084–1092.
- 811 FitzJohn RG, Maddison WP, and Otto SP (2009) Estimating trait-dependent speciation and  
812 extinction rates from incompletely resolved phylogenies. *Syst Biol* 58:595–611.
- 813 Gerhardt HC (1994) The evolution of vocalization in frogs and toads. *Annu Rev Ecol Syst*  
814 25:233–324.
- 815 Gerhardt HC, Huber F (2002) *Acoustic communication in insects and anurans: common*  
816 *problems and diverse solutions*. Chicago (IL): The University of Chicago Press.
- 817 Gilbert CM, Bell RC (2018) Evolution of advertisement calls in an island radiation of African  
818 reed frogs. *Biol J Linn Soc* 123:1–11.
- 819 Gomez D, Richardson C, Lengagne T, Plenet S, Joly P, Léna J-P, Théry M (2009) The role of  
820 nocturnal vision in mate choice: females prefer conspicuous males in the European tree frog  
821 (*Hyla arborea*). *Proc R Soc B* 276:2351–2358.
- 822 Gomez D, Richardson C, Lengagne T, Derex M, Plenet S, Joly P, Léna J-P, Théry M (2010)  
823 Support for a role of colour vision in mate choice in the nocturnal European treefrog.  
824 *Behaviour* 147:1753–1768.
- 825 Grafe TU (1997) Costs and benefits of mate choice in the lek-breeding reed frog, *Hyperolius*

- 826 *marmoratus*. *Anim Behav* 53:1103–1117.
- 827 Greenbaum E, Sinsch U, Lehr E, Valdez F, Kusamba C (2013) Phylogeography of the reed frog  
828 *Hyperolius castaneus* (Anura: Hyperoliidae) from the Albertine Rift of Central Africa:  
829 implications for taxonomy, biogeography and conservation. *Zootaxa* 3131:473–494.
- 830 Han X, Fu J (2013) Does life history shape sexual size dimorphism in anurans? A comparative  
831 analysis. *BMC Evol Biol* 13:27.
- 832 Hayes TB (1997) Hormonal mechanisms as potential constraints on evolution: examples from  
833 the Anura. *Am Zool* 37:482–490.
- 834 Hayes TB, Menendez KP (1999) The effect of sex steroids on primary and secondary sex  
835 differentiation in the sexually dichromatic reedfrog (*Hyperolius argus*: Hyperolidae) from the  
836 Arabuko Sokoke forest of Kenya. *Gen Comp Endocr* 115:188–199.
- 837 Heinsohn R, Legge S, Endler JA (2005) Extreme reversed sexual dichromatism in a bird without  
838 sex role reversal. *Science* 309:617–619.
- 839 Hofmann CM, Cronin TW, Omland KE (2008) Evolution of sexual dichromatism. 1. Convergent  
840 losses of elaborate female coloration in New World orioles (*Icterus* spp.) *Auk* 125:778–789.
- 841 Huang H, Rabosky DL (2014) Sexual selection and diversification: reexamining the correlation  
842 between dichromatism and speciation rate in birds. *Am Nat* 184(5):E104–E114.
- 843 Jacobs LE, Vega A, Dudgeon S, Kaiser K, Robertson JM (2016) Local not vocal: assortative  
844 female choice in divergent populations of red-eyed treefrogs, *Agalychnis callidryas* (Hylidae:  
845 Phyllomedusinae). *Biol J Linn Soc* 120:171–178.
- 846 Jeckel AM, Grant T, Saporito RA (2015) Sequestered and synthesized chemical defenses in the  
847 poison frog *Melanophryniscus moreirae*. *J Chem Ecol* 41:505–512.
- 848 Jennions MD, Bishop PJ, Backwell PRY, Passmore NI (1995) Call rate variability and female

- 849 choice in the African frog, *Hyperolius marmoratus*. *Behaviour* 132:709–720.
- 850 Johnson AE, Price JJ, Pruett-Jones S (2013) Different modes of evolution in males and females  
851 generate dichromatism in fairy-wrens (Maluridae). *Ecol Evol* 3:3030–3046.
- 852 Kazancıoğlu E, Near TJ, Hanel R, Wainwright PC (2009) Influence of sexual selection and  
853 feeding functional morphology on diversification rate of parrotfishes. *Proc R Soc B*  
854 276:3439–3446.
- 855 Katoh K, Standley DM (2013) MAFFT multiple sequence alignment software version 7:  
856 improvements in performance and usability. *Mol Biol Evol* 30:722–780.
- 857 Katoh K, Kuma K, Toh H, Miyata T (2005) MAFFT version 5: improvement in accuracy of  
858 multiple sequence alignment. *Nucleic Acids Res* 33:511–518.
- 859 Katoh K, Misawa K, Kuma K, Miyata T (2002) MAFFT: a novel method for rapid multiple  
860 sequence alignment based on fast Fourier transform. *Nucleic Acids Res* 30:3059–3066.
- 861 Kimball RT, Ligon JD (1999) Evolution of avian plumage dichromatism from a proximate  
862 perspective. *Am Nat* 154(2):182–193.
- 863 Kimball RT, Braun EL, Ligon JD, Lucchini V, Randi E (2001) A molecular phylogeny of the  
864 peacock-pheasants (Galliformes: *Polyplectron* spp.) indicates loss and reduction of  
865 ornamental traits and display behaviours. *Biol J Linn Soc* 73:187–198.
- 866 Kindermann C, Hero J-M (2016) Rapid dynamic colour change is an intrasexual signal in a lek  
867 breeding frog (*Litoria wilcoxii*). *Behav Ecol Sociobiol* 70:1995–2003.
- 868 King B, Lee MSY (2015) Ancestral state reconstruction, rate heterogeneity, and the evolution of  
869 reptile viviparity. *Syst Biol* 64:532–544.
- 870 Kirkpatrick M (1982) Sexual selection and the evolution of female choice. *Evolution* 36:1–12.
- 871 Kouamé N’GG, Boateng CO, Rödel M-O (2013) A rapid survey of the amphibians from the

- 872 Atewa Range Forest Reserve, Eastern Region, Ghana. *A Rapid Biological Assessment of the*  
873 *Atewa Range Forest Reserve, Eastern Ghana*, ed. Conservation International (Arlington,  
874 Virginia), pp 76–83.
- 875 Kouamé AM, Kouamé N’GG, Konan JCBYN’G, Adepo-Gourène B, Rödel M-O (2015)  
876 Contributions to the reproductive biology and behaviour of the dotted reed frog, *Hyperolius*  
877 *guttulatus*, in southern-central Ivory Coast, West Africa. *Herpetology Notes* 8:633–641.
- 878 Kraaijeveld K, Kraaijeveld-Smit FJL, Maan ME (2011) Sexual selection and speciation: the  
879 comparative evidence revisited. *Biol Rev* 86:367–377.
- 880 Kurabayashi A, Sumida M (2013) Afrobatrachian mitochondrial genomes: genome  
881 reorganization, gene rearrangement mechanisms, and evolutionary trends of duplicated and  
882 rearranged genes. *BMC Genomics* 14:633.
- 883 Lande R (1981) Models of speciation by sexual selection on polygenic traits. *Proc Natl Acad Sci*  
884 *USA* 78:3721–3725.
- 885 Lande R (1982) Rapid origin of sexual isolation and character displacement in a cline. *Evolution*  
886 36:213–223.
- 887 Lewis PO (2001) A likelihood approach to estimating phylogeny from discrete morphological  
888 character data. *Syst Biol* 50:913–925.
- 889 Liedtke HC, Hügil D, Dehling JM, Pupin F, Menegon M, Plumptre AJ, Kujirakwinja D, Loader  
890 SP (2014) One or two species? On the case of *Hyperolius discodactylus* Ahl, 1931 and *H.*  
891 *alticola* Ahl, 1931 (Anura: Hyperoliidae). *Zootaxa* 3768:253–290.
- 892 Liu L, Yu L, Edwards SV (2010) A maximum pseudo-likelihood approach for estimating species  
893 trees under the coalescent model. *BMC Evol Biol* 10:302.
- 894 Loader SP, Ceccarelli FS, Menegon M, Howell KM, Kassahun R, Mengistu AA, Saber SA,



- 895 Gebresenbet F, de Sa R, Davenport TRB, Larson JG, Müller H, Wilkinson M, Gower DJ  
896 (2014) Persistence and stability of Eastern Afromontane forests: evidence from brevicipitid  
897 frogs. *J Biogeogr* 41:1781–1792.
- 898 Loader SP, Lawson LP, Portik DM, Menegon M (2015) Three new species of spiny throated  
899 reed frogs (Anura: Hyperoliidae) from evergreen forests of Tanzania. *BMC Research Notes*  
900 8:167.
- 901 Luiselli L, Bikikoro L, Odegbune E, Wariboko SM, Rugiero L, Akani GC, Politano E (2004)  
902 Feeding relationships between sympatric Afrotropical frogs (genus *Hyperolius*): the effects  
903 of predator body size and season. *Animal Biology* 54:293–302.
- 904 Maddison WP, Midford PE, Otto SP (2007) Estimating a binary character's effect on speciation  
905 and extinction. *Syst Biol* 56:701–710.
- 906 Maan ME, Cummings ME (2009) Sexual dimorphism and directional sexual selection on  
907 aposematic signals in a poison frog. *Proc Natl Acad Sci USA* 106:19072–19077.
- 908 McDiarmid RW (1975) Glass frog romance along a tropical stream. *Nat. Hist. Mus. Los Angeles*  
909 *Co. Terra*. 13(4):14–18.
- 910 Mendelson TC, Shaw KL (2012) The (mis)concept of species recognition. *Trends Ecol. Evol.*  
911 27:421–427.
- 912 Meyer M, Kircher M (2010) Illumina sequencing library preparation for highly multiplexed  
913 target capture and sequencing. *Cold Spring Harbor Protocols* 2010:pdb.prot5448.
- 914 Mirarab S, Warnow T (2015) ASTRAL-II: coalescent-based species tree estimation with many  
915 hundreds of taxa and thousands of genes. *Bioinformatics* 31:i44–i52.
- 916 Mirarab S, Reaz R, Bayzid MdS., Zimmermann T, Swenson MS, Warnow T (2014) ASTRAL:  
917 genome-scale coalescent-based species tree estimation. *Bioinformatics* 30:i541–i548.

- 918 Misof B (2002) Diversity of Anisoptera (Odonata): inferring speciation processes from patterns  
919 of morphological diversity. *Zoology* 105:355–365.
- 920 Morrow EH, Pitcher TE, Anrqvist G (2003) No evidence that sexual selection is an ‘engine of  
921 speciation’ in birds. *Ecol Lett* 6:228–234.
- 922 Nali RC, Zamudio KR, Haddad CFB, Prado CPA. 2014. Size-dependent selective mechanisms  
923 on males and females and the evolution of sexual size dimorphism in frogs. *Am Nat* 184:727–  
924 740.
- 925 Omland KE (1997) Examining two standard assumptions of ancestral reconstructions: repeated  
926 loss of dichromatism in dabbling ducks. *Evolution* 51:1636–1646.
- 927 Oring LW (1982) Avian mating systems. *Avian Biology*, eds Farner DS, King JS, Parkes KC  
928 (Academic Press, New York), pp 1–92.
- 929 Owens IPF, Bennett PM, Harvey PH (1999) Species richness among birds: body size, life  
930 history, sexual selection or ecology? *Proc R Soc Lon B* 266:933–939.
- 931 Palumbi S, Martin A, Romano S, McMillan WO, Stice L, Grabowski G (1991) *The Simple  
932 Fool’s Guide to PCR. Version 2*. Honolulu: University of Hawaii.
- 933 Panhuis TM, Butlin R, Zuk M, Tregenza T (2001) Sexual selection and speciation. *Trends Ecol  
934 Evol* 16(7):364–371.
- 935 Paradis E, Claude J, Strimmer K (2004) APE: analysis of phylogenetics and evolution in R  
936 language. *Bioinformatics* 20:289–290.
- 937 Phillimore AB, Freckleton RP, Orme CDL, Owens IPF (2006) Ecology predicts large-scale  
938 patterns of phylogenetic diversification in birds. *Am Nat* 168(2):220–229.
- 939 Portik DM (2015) *Diversification of Afrobatrachian frogs and the herpetofauna of the Arabian  
940 Peninsula*. PhD Thesis. University of California, Berkeley.

- 941 Portik DM, Blackburn DC (2016) The evolution of reproductive diversity in Afrobatrachia: a  
942 phylogenetic comparative analysis of an extensive radiation of African frogs. *Evolution*  
943 70(9):2017–2032.
- 944 Portik DM, Scheinberg L, Blackburn DC, Saporito RA (2015) Lack of defensive alkaloids in the  
945 integumentary tissue of four brilliantly colored African reed frog species (Hyperoliidae:  
946 *Hyperolius*). *Herpetological Conservation and Biology* 10:833–838.
- 947 Portik DM, Jongsma GF, Kouete MT, Scheinberg LA, Freiermuth B, Tapondjou WP, Blackburn  
948 DC (2016a) A survey of amphibians and reptiles in the foothills of Mount Kupe, Cameroon.  
949 *Amphibian and Reptile Conservation* 10(2)[Special Section]:37–67(e131).
- 950 Portik DM, Smith LL, Bi K (2016b) An evaluation of transcriptome-based exon capture for frog  
951 phylogenomics across multiple scales of divergence (Class: Amphibia, Order: Anura). *Mol*  
952 *Ecol Resour* 16:1069–1083.
- 953 Portik DM, Smith LL, Bi K (2016c) Data from: An evaluation of transcriptome-based exon  
954 capture for frog phylogenomics across multiple scales of divergence (Class: Amphibia,  
955 Order: Anura). *Dryad Digital Repository*. <https://doi.org/10.5061/dryad.pr3pr>.
- 956 Portik DM, Jongsma GF, Kouete MT, Scheinberg LA, Freiermuth B, Tapondjou WP, Blackburn  
957 DC (2018). Ecological, morphological, and reproductive aspects of a diverse assemblage of  
958 hyperoliid frogs (Family: Hyperoliidae) surrounding Mt. Kupe, Cameroon. *Herpetol Rev*, In  
959 Press.
- 960 Price JJ, Eaton MD (2014) Reconstructing the evolution of sexual dichromatism: current color  
961 diversity does not reflect past rates of male and female change. *Evolution* 68:2026–2037.
- 962 Price T (1998) Sexual selection and natural selection in bird speciation. *Phil Trans R Soc Lond B*  
963 353:251–260.

- 964 Price T, Birch GL (1996) Repeated evolution of sexual color dimorphism in passerine birds. *Auk*  
965 113:842–848.
- 966 Pyron RA, Wiens JJ. 2011. A large-scale phylogeny of Amphibia including over 2800 species,  
967 and a revised classification of extant frogs, salamanders, and caecilians. *Mol Phylogenet Evol*  
968 61:543–583.
- 969 Rabosky DL, Goldberg EE (2015) Model inadequacy and mistaken inferences of trait-dependent  
970 speciation. *Syst Biol* 64:340–355.
- 971 Rambaut A, Drummond AJ, Suchard M (2013). Tracer v1.6.0. Available from:  
972 <http://beast.bio.ed.ac.uk/>
- 973 Revell LJ (2012) Phytools: an R package for phylogenetic comparative biology (and other  
974 things). *Methods Ecol Evol* 3:217–223.
- 975 Richards CM (1982) The alteration of chromatophore expression by sex hormones in the Kenyan  
976 Reed Frog, *Hyperolius viridiflavus*. *General and Comparative Endocrinology* 46:59–67.
- 977 Ritchie MG (2007) Sexual selection and speciation. *Ann Rev Ecol Evol S* 38:79–102.
- 978 Rödel M-O, Grafe TU, Rudolf VHW, Ernst R (2002) A review of West African spotted *Kassina*,  
979 including a description of *Kassina schioetzi* sp. nov. (Amphibia: Anura: Hyperoliidae).  
980 *Copeia* 2002:800–814.
- 981 Rödel M-O, Kosuch J, Veith M, Ernst R (2003) First record of the genus *Acanthixalus* Laurent,  
982 1944 from the Upper Guinean Rain Forest, West Africa, with the description of a new  
983 species. *J Herpetol* 37:43–52.
- 984 Rödel M-O, Kosuch J, Grafe TU, Boistel R, Asseman NE, Kouamé NG, Tohé B, Gourène G,  
985 Perret J-L, Henle K, Tafforeau P, Pollet N, Veith M (2009) A new tree-frog genus and  
986 species from Ivory Coast, West Africa (Amphibia: Anura: Hyperoliidae). *Zootaxa* 2044:23–

- 987 45.
- 988 Rödel M-O, Sandberger L, Penner J, Mané Y, Hillers A (2010) The taxonomic status of  
989 *Hyperolius spatzi* Ahl, 1931 and *Hyperolius nitidulus* Peters, 1875 (Amphibia: Anura:  
990 Hyperoliidae). *Bonn Zoological Bulletin* 57:177–188.
- 991 Roede M (1972) Color as related to size, sex and behavior in seven Caribbean labrid fish species  
992 (genera *Thalassoma*, *Halichoeres* and *Hemipteronotus*). *Studies on the fauna of Curacao and*  
993 *other Caribbean Islands* 42:1–266.
- 994 Roelants K, Gower DJ, Wilkinson M, Loader SP, Biju SD, Guillaume K, Moriau L, Bossuyt F  
995 (2007) Global patterns of diversification in the history of modern amphibians. *Proc Natl*  
996 *Acad Sci USA* 104:887–892.
- 997 Ryan MJ (1980) Female choice in a Neotropical frog. *Science* 209:523–525.
- 998 Safran RJ, Scordato ESC, Symes LB, Rodríguez RL, Mendelson TC (2013) Contributions of  
999 natural and sexual selection to the evolution of premating reproductive isolation: a research  
1000 agenda. *Trends Ecol. Evol.* 28:643–650.
- 1001 Salthe SN, Duellman WE (1973) Quantitative constraints associated with reproductive mode in  
1002 anurans. *Evolutionary Biology of the Anurans*, ed Vial JL (University of Missouri Press,  
1003 Missouri), pp 229–249.
- 1004 Sanderson MJ (2002) Estimating absolute rates of molecular evolution and divergence times: a  
1005 penalized likelihood approach. *Mol Biol Evol* 19:101–109.
- 1006 Saporito RA, Donnelly MA, Spande TF, Garraffo HM (2012) A review of chemical ecology in  
1007 poison frogs. *Chemoecology* 22:159–168.
- 1008 Sayyari E, Mirarab S (2016) Fast coalescent-based computation of local branch support from  
1009 quartet frequencies. *Mol Biol Evol* 33:1654–1668.

- 1010 Schick S, Kielgast J, Rödder D, Muchai V, Burger M, Lötters S (2010) New species of reed frog  
1011 from the Congo Basin with discussion of paraphyly in cinnamon-belly reed frogs. *Zootaxa*  
1012 2501:23–36.
- 1013 Schiøtz A (1967) The treefrogs (Rhacophoridae) of West Africa. *Spolia Zoologica Musei*  
1014 *Hauniensis* 25:1–346.
- 1015 Schiøtz A (1999) *Treefrogs of Africa*. Edition Chimaira, Frankfurt, Germany.
- 1016 Seddon N, Botero CA, Tobias JA, Dunn PO, MacGregor HEA, Rubenstein DR, Uy AC, Weir  
1017 JT, Whittingham LA, Safran RJ (2013) Sexual selection accelerates signal evolution during  
1018 speciation in birds. *Proc R Soc B* 280:20131065.
- 1019 Selander RK (1966) Sexual dimorphism and differential niche utilization in birds. *The Condor*  
1020 68:113–151.
- 1021 Seo T-K (2008) Calculating bootstrap probabilities of phylogeny using multilocus sequence data.  
1022 *Mol Biol Evol* 25:960–971.
- 1023 Shine R (1979) Sexual selection and sexual dimorphism in the Amphibia. *Copeia* 1979:297–306.
- 1024 Shine R (1989) Ecological causes for the evolution of sexual dimorphism: a review of the  
1025 evidence. *Q. Rev. Biol.* 64(4):419–461.
- 1026 Shultz AJ, Burns KJ (2017) The role of sexual and natural selection in shaping patterns of sexual  
1027 dichromatism in the largest family of songbirds (Aves: Thraupidae). *Evolution*  
1028 71:1061–1074.
- 1029 Singhal S (2013) De novo transcriptomic analyses for non-model organisms: an evaluation of  
1030 methods across a multi-species data set. *Mol Ecol Resour* 13:403–416.
- 1031 Stamatakis A (2014) RAxML version 8: a tool for phylogenetic analysis and post-analysis of  
1032 large phylogenies. *Bioinformatics* 30:1312–1313.

- 1033 Starnberger I, Poth D, Peram PS, Schulz S, Vences M, Knudsen J, Barej MF, Rödel M-O, Walzl  
1034 M, Hödl W (2013) Take time to smell the frogs: vocal sac glands of reed frogs (Anura:  
1035 Hyperoliidae) contain species-specific chemical cocktails. *Biol J Linn Soc* 110:828–838.
- 1036 Starnberger I, Preininger D, Hödl W (2014) From uni- to multimodality: towards an integrative  
1037 view on anuran communication. *J Comp Physiol A* 200:777–787.
- 1038 Stuart-Fox D, Owens IPF (2003) Species richness in agamid lizards: chance, body size, sexual  
1039 selection or ecology? *J Evolution Biol* 16:659–669.
- 1040 Sztatecsny M, Preininger D, Freudmann A, Loretto M-C, Maier F, Hödl W (2012) Don't get the  
1041 blues: conspicuous nuptial colouration of male moor frogs (*Rana arvalis*) supports visual  
1042 mate recognition during scramble competition in large breeding aggregations. *Behav Ecol*  
1043 *Sociobiol* 66:1587–1593.
- 1044 Telford SR, Dyson ML (1988) Some determinants of the mating system in a population of  
1045 painted reed frogs (*Hyperolius marmoratus*). *Behaviour* 106:265–278.
- 1046 Telford SR, Passmore NI (1981) Selective phonotaxis of four sympatric species of African reed  
1047 frogs (genus *Hyperolius*). *Herpetologica* 37:29–32.
- 1048 Turelli M, Barton NH, Coyne JA (2001) Theory and speciation. *Trends Ecol Evol*  
1049 16(7):330–342.
- 1050 Veith M, Kosuch J, Rödel M-O, Hillers A, Schmitz A, Burger M, Lötters S (2009) Multiple  
1051 evolution of sexual dichromatism in African reed frogs. *Mol Phylogenet Evol* 51:388–393.
- 1052 Wagner CE, Harmon LJ, Seehausen O (2012) Ecological opportunity and sexual selection  
1053 together predict adaptive radiation. *Nature* 487:366–369.
- 1054 Wells KD (1977) The social behavior of anuran amphibians. *Anim Behav* 25:666–693.
- 1055 West-Eberhard MJ (1983) Sexual selection, social competition, and speciation. *Q Rev Biol*

- 1056 58(2):155–183.
- 1057 Wieczorek A, Drewes R, Channing A (2000) Biogeography and evolutionary history of  
1058 *Hyperolius* species: application of molecular phylogeny. *J Biogeogr* 27:1231–1243.
- 1059 Wollenberg KC, Glaw F, Meyer A, Vences M (2007) Molecular phylogeny of Malagasy reed  
1060 frogs, *Heterixalus*, and the relative performance of bioacoustics and color-patterns for  
1061 resolving their systematics. *Mol Phylogenet Evol* 45:14–22.
- 1062 Woolbright LL (1983) Sexual selection and size dimorphism in anuran Amphibia. *Am Nat*  
1063 121:110–119.
- 1064 Yovanovich CAM, Koskela SM, Nevala N, Kondrashev SL, Kelber A, Donner K (2017) The  
1065 dual rod system of amphibians supports colour discrimination at the absolute visual  
1066 threshold. *Phil Trans R Soc* 372:20160066.
- 1067 Zhang C, Sayyari E, Mirarab S (2017) ASTRAL-III: Increased Scalability and Impacts of  
1068 Contracting Low Support Branches. *Comparative Genomics. RECOMB-CG 2017*. Lecture  
1069 Notes in Computer Science, vol 10562, eds Meidanis J, Nakhleh L (Springer, Cham), pp  
1070 53–75.
- 1071



1072 **FIGURE CAPTIONS**

1073

1074 Figure 1. Illustration of ontogenetic color change occurring in hyperoliid frogs (*Hyperolius*  
1075 *dintelmanni* shown) that underlies sexual dichromatism. In dichromatic species, females undergo  
1076 a color change from Phase J to Phase F in response to steroid hormones at the onset of sexual  
1077 maturity. Males retain the juvenile coloration (Phase J) or undergo a parallel change in color (to  
1078 Phase F), however the proportion of the male color phases in populations varies across species.  
1079 Secondary monochromatism can evolve from dichromatism through the loss of Phase J males  
1080 (both sexes undergo an ontogenetic color change to Phase F) or through the loss of ontogenetic  
1081 color change in both sexes (both sexes retain Phase J coloration at sexual maturity).

1082

1083 Figure 2. Ancestral state reconstruction of sexual dichromatism in Afrobatrachian frogs from  
1084 HiSSE using model averaging to account for uncertainty in both models and reconstructions.  
1085 Circles at tips and nodes are colored by state (yellow: monochromatic, blue: sexually  
1086 dichromatic), with node pie charts indicating probability of a state assignment. Branches are  
1087 colored using a gradient from the model-averaged net diversification rate, with black  
1088 representing the slowest rate and red representing the fastest rate. The arrow highlights the node  
1089 identified as displaying an unambiguous transition from monochromatism to sexual  
1090 dichromatism.

1091

1092 Figure 3. The net diversification rate confidence intervals estimated from the best-fit HiSSE  
1093 model for various combinations of monochromatism, dichromatism, and the presence (+) or  
1094 absence (-) of the hidden state.

1095

1096 Figure 4. Histograms of the delta AIC comparisons resulting from (A) BiSSE analyses and (B)  
1097 HiSSE analyses of the 1,500 simulations of neutrally evolving traits on the Afrobatrachia  
1098 phylogeny. The vertical dotted line represents a delta AIC of two. In the BiSSE analyses (A),  
1099 delta AIC scores of less than two are considered a failure to reject the ‘null’ model of constant  
1100 diversification rates, whereas scores above two for the BiSSE model are interpreted as favoring a  
1101 correlation between diversification rates and the simulated neutral trait. The HiSSE analyses (B)  
1102 included five models, but only two were consistently selected as the top ranking, including the  
1103 HiSSE and CID-4 (character-independent diversification) models. For these analyses delta AIC >  
1104 2 was considered as support for a particular model, whereas delta AIC < 2 was considered as  
1105 equivocal support for the model.

1106

1107 Figure 5. Illustration of (A) several *Hyperolius* species in the predominately sexually  
1108 dichromatic Clade 1 and (B) several *Hyperolius* species in Clade 2 that exhibit multiple  
1109 transitions to secondary monochromatism. Females are positioned in the top row, with males  
1110 below (unless shown in amplexus), and the phylogenetic relationships among species are  
1111 depicted (though not all species have been included).

1112

1113 **TABLES**

1114 Table 1. Summary of models and fits using hidden state speciation and extinction analyses, with

1115 sexual dichromatism as the observed state. The top ranked model is highlighted in bold.

1116

| Description  | Model     | loglik         | AIC           | $\Delta$ AIC | wtAIC        | Hidden States    | State-dependent | Net turnover rates | Extinction fraction rates | Distinct transition rates |
|--------------|-----------|----------------|---------------|--------------|--------------|------------------|-----------------|--------------------|---------------------------|---------------------------|
| <b>HISSE</b> | <b>19</b> | <b>-1033.5</b> | <b>2082.9</b> | <b>0.0</b>   | <b>0.445</b> | <b>yes</b>       | <b>yes</b>      | <b>4</b>           | <b>1</b>                  | <b>3</b>                  |
| HiSSE        | 15        | -1026.0        | 2084.0        | 1.0          | 0.266        | yes              | yes             | 4                  | 4                         | 8                         |
| HiSSE        | 18        | -1029.7        | 2085.4        | 2.5          | 0.130        | yes              | yes             | 4                  | 1                         | 8                         |
| CID-4        | 14        | -1035.3        | 2086.5        | 3.6          | 0.075        | yes              | no              | 4                  | 1                         | 3                         |
| CID-2        | 8         | -1031.7        | 2087.3        | 4.4          | 0.049        | yes              | no              | 2                  | 2                         | 8                         |
| HiSSE        | 16        | -1033.5        | 2088.9        | 6.0          | 0.022        | yes              | yes             | 4                  | 4                         | 3                         |
| HiSSE        | 25        | -1036.1        | 2092.2        | 9.3          | 0.004        | only for state 0 | yes             | 3                  | 3                         | 4                         |
| CID-4        | 12        | -1035.3        | 2092.5        | 9.6          | 0.004        | yes              | no              | 4                  | 4                         | 3                         |
| CID-4        | 26        | -1029.7        | 2093.4        | 10.4         | 0.002        | yes              | no              | 4                  | 4                         | 9                         |
| CID-2        | 10        | -1036.2        | 2094.4        | 11.5         | <0.001       | yes              | no              | 2                  | 1                         | 8                         |
| HiSSE        | 24        | -1041.1        | 2102.3        | 19.3         | <0.001       | only for state 1 | yes             | 3                  | 3                         | 4                         |
| BiSSE-like   | 2         | -1046.3        | 2102.6        | 19.7         | <0.001       | no               | yes             | 2                  | 1                         | 2                         |
| BiSSE-like   | 1         | -1046.3        | 2104.6        | 21.7         | <0.001       | no               | yes             | 2                  | 2                         | 2                         |
| BiSSE-like   | 3         | -1053.5        | 2115.1        | 32.1         | <0.001       | no               | no              | 1                  | 1                         | 2                         |
| HiSSE        | 22        | -1055.7        | 2121.5        | 38.5         | <0.001       | yes              | yes             | 4                  | 1                         | 3                         |
| HiSSE        | 21        | -1053.6        | 2127.2        | 44.3         | <0.001       | yes              | yes             | 4                  | 1                         | 8                         |
| CID-4        | 13        | -1060.2        | 2132.4        | 49.4         | <0.001       | yes              | no              | 4                  | 1                         | 1                         |
| HiSSE        | 20        | -1061.9        | 2135.7        | 52.8         | <0.001       | yes              | yes             | 4                  | 1                         | 1                         |
| HiSSE        | 17        | -1060.4        | 2138.7        | 55.8         | <0.001       | yes              | yes             | 4                  | 4                         | 1                         |
| CID-4        | 11        | -1060.4        | 2138.8        | 55.8         | <0.001       | yes              | no              | 4                  | 4                         | 1                         |
| CID-2        | 9         | -1068.1        | 2144.2        | 61.3         | <0.001       | yes              | no              | 2                  | 1                         | 1                         |
| CID-2        | 7         | -1068.1        | 2146.2        | 63.3         | <0.001       | yes              | no              | 2                  | 2                         | 1                         |
| BiSSE-like   | 4         | -1071.4        | 2152.8        | 69.8         | <0.001       | no               | yes             | 2                  | 2                         | 1                         |
| HiSSE        | 23        | -1073.9        | 2153.7        | 70.8         | <0.001       | yes              | yes             | 4                  | 1                         | 1                         |
| BiSSE-like   | 5         | -1075.2        | 2158.3        | 75.4         | <0.001       | no               | yes             | 2                  | 1                         | 1                         |
| BiSSE-like   | 6         | -1077.6        | 2161.2        | 78.3         | <0.001       | no               | no              | 1                  | 1                         | 1                         |

1117

1118

1119 Table 2. Summary of trait rate analyses for the evolution of sexual dichromatism.  
1120

---

| Trait Rate Analysis     | Log<br>Marginal<br>Likelihood | Transitions<br>0 > 1 | Transitions<br>1 > 0 | Rate<br>Shifts | Rate<br>Minimum | Rate<br>Maximum |
|-------------------------|-------------------------------|----------------------|----------------------|----------------|-----------------|-----------------|
| Strict Clock Mk1        | -92.12                        | 15                   | 7                    | –              | –               | –               |
| Strict Clock Mk2        | -81.83                        | 2                    | 27                   | –              | –               | –               |
| Relaxed Local Clock Mk1 | -85.10                        | 16                   | 8                    | 3.3            | 0.001           | 0.019           |
| Relaxed Local Clock Mk2 | -81.73                        | 2                    | 27                   | 0.8            | 0.013           | 0.016           |

---

1121 For transition summaries, monochromatism is coded as ‘0’ and dichromatism as ‘1’. The average number of rate

1122 shifts is provided, rather than median.

1123 **SUPPLEMENTAL MATERIAL**

1124 Figure S1. A species tree of Hyperoliidae inferred from 1,047 gene trees with ASTRAL-III. Node  
1125 support is shown for quartet support values and multi-locus bootstraps, with branch lengths  
1126 depicted in coalescent units (except for tree tips, represented by dotted lines).

1127

1128 Figure S2. A chronogram of Afrobatrachia inferred from the multilocus BEAST analysis of 283  
1129 species. Taxa labeled with blue color denote the 153 species included in the hyperoliid species  
1130 tree that was used as a partial constraint tree in this analysis. Node support values are not shown  
1131 because the tree topology was fixed, but error bars representing the 95% HPD for dating  
1132 estimates are provided.

1133

1134 Figure S3. A comparison of Bayesian ancestral character reconstructions inferred using the  
1135 stochastic Mk model of character evolution with symmetrical (Mk1) or asymmetrical (Mk2)  
1136 transition rates in combination with a strict clock or random local clock model. All analyses  
1137 enforced a monochromatic root prior. The marginal likelihoods and average number of state  
1138 changes are shown for each analysis. Node sizes reflect the posterior probability for the inferred  
1139 character state, and tips and nodes are colored with monochromatism in yellow and  
1140 dichromatism in blue.

1141

1142 Figure S4. An illustration of transitions to secondary monochromatism inferred using Bayesian  
1143 ancestral character reconstruction with the Mk2 and strict clock models. Large nodes outlined  
1144 with red represent inferred transitions to monochromatism from a dichromatic ancestor. States at  
1145 nodes and tips are colored with monochromatism in yellow and dichromatism in blue.

1146

1147 Figure S5. Ancestral state reconstruction of the observed and hidden state combinations in  
1148 Afrobatrachian frogs from the best-fit HiSSE model (HiSSE 19; Table 1). Squares at tips are  
1149 colored by the observed character states (yellow: monochromatic, blue: sexually dichromatic),  
1150 whereas node pie charts represent the probability of a state assignment to: 1) monochromatism +  
1151 hidden state absent (yellow), 2) monochromatism + hidden state present (orange), 3)  
1152 dichromatism + hidden state absent (blue), or 4) dichromatism + hidden state present (purple).  
1153 No instance of the monochromatism + hidden state present is reconstructed on the phylogeny,  
1154 whereas a transition to the dichromatism + hidden state present combination is inferred once in  
1155 the MRCA of two monotypic genera (*Cryptothylax*, *Morerella*), indicating a near absence of the  
1156 hidden state across the entire tree.

1157

1158 Table S1. Taxon, voucher, and locality information for all samples included in the sequence-  
1159 capture experiment.

1160

1161 Table S2. A summary of the occurrence of monochromatism and sexual dichromatism in  
1162 Afrobatrachian species based on literature, museum specimens, and collective field observations.

Juvenile (Phase J)

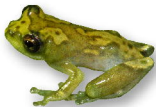

♂

♀

Male Phase F

Male Phase J

Female Phase F

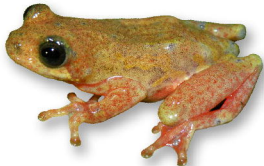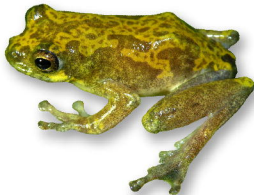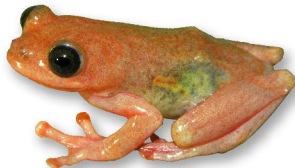

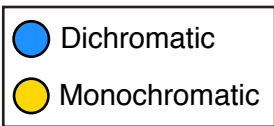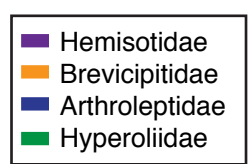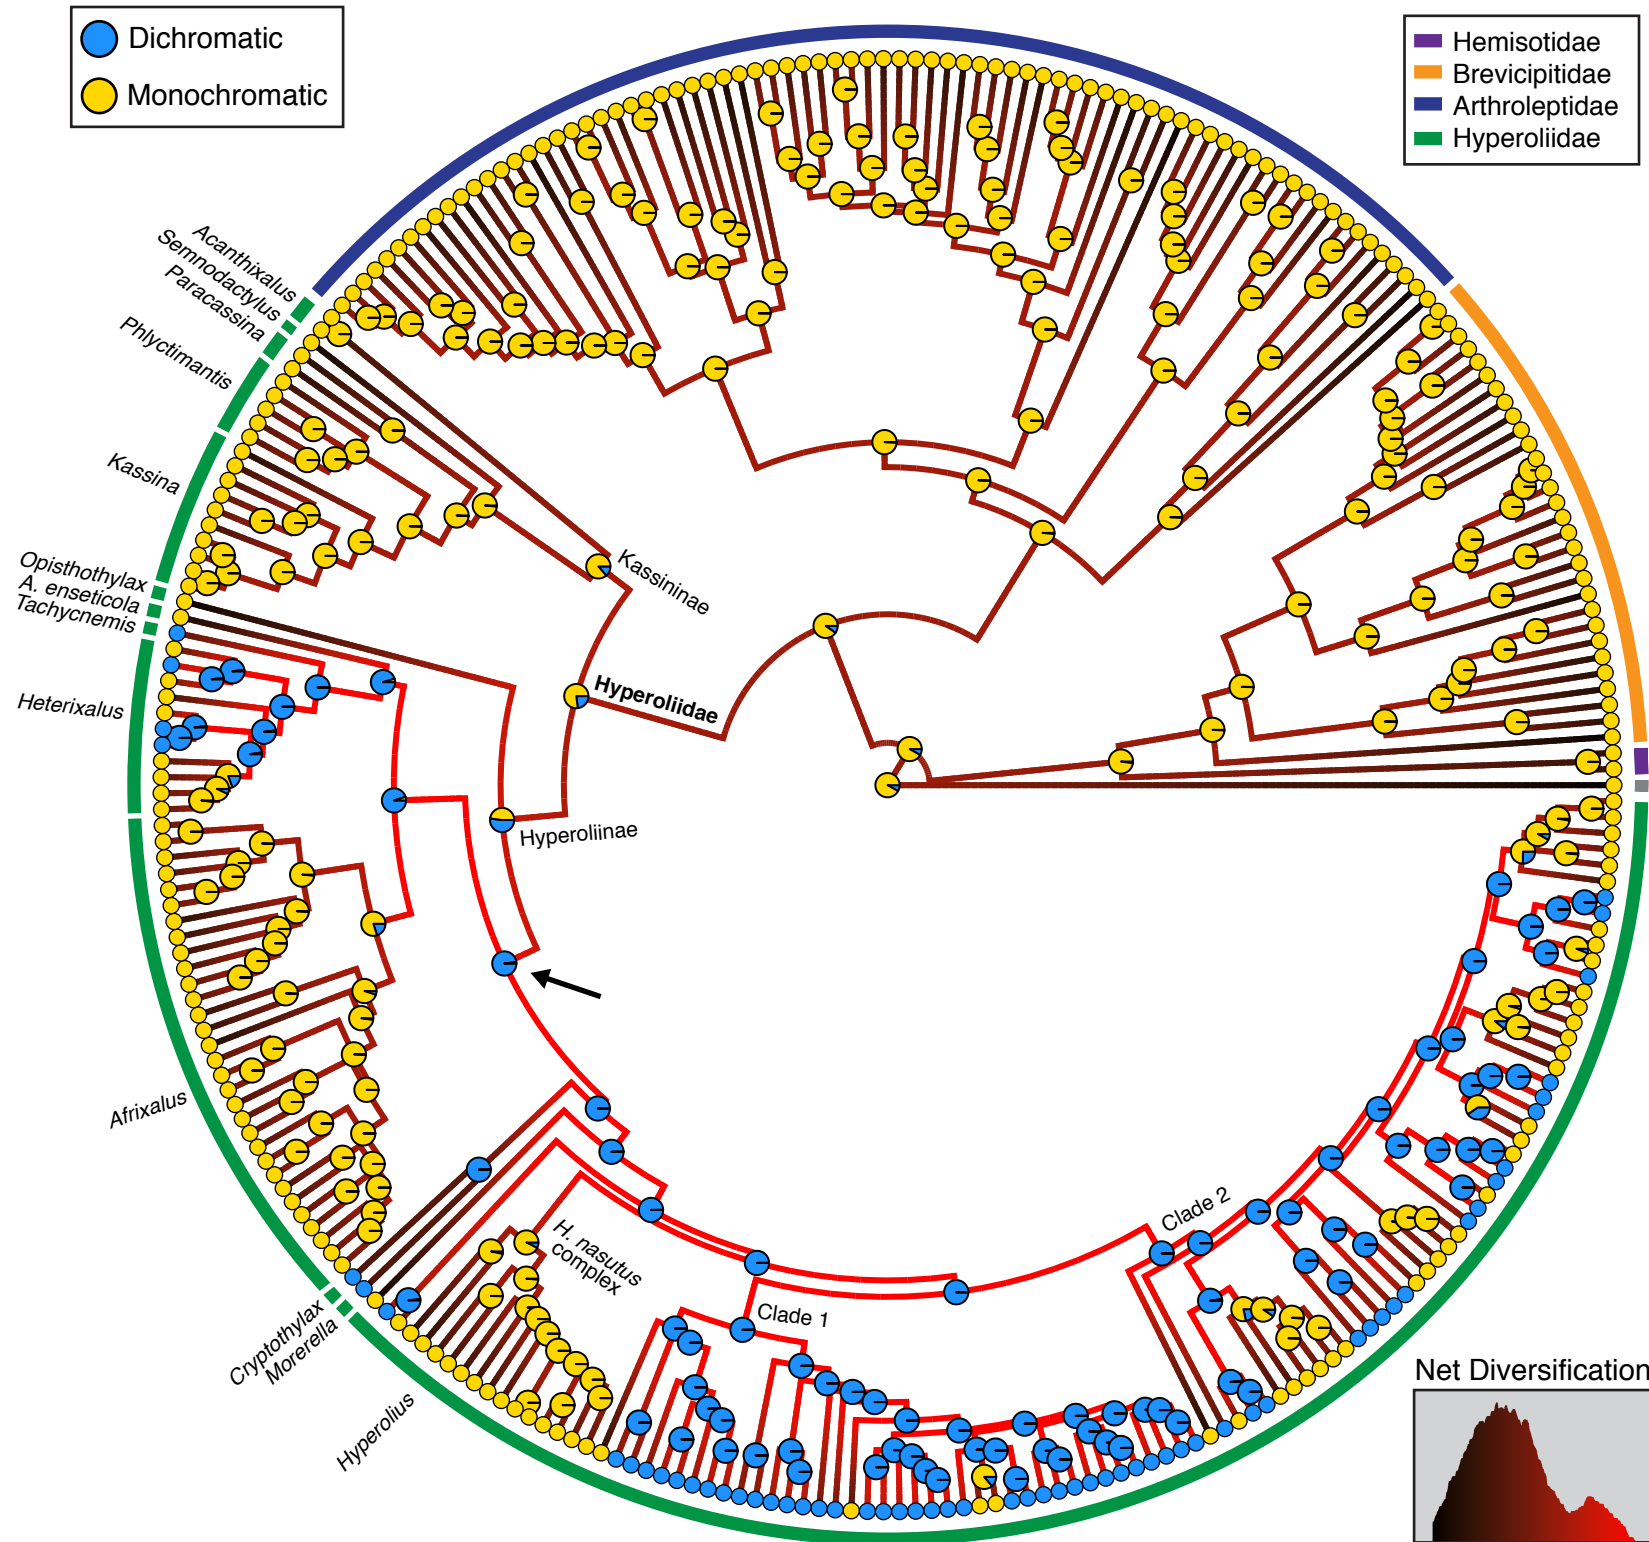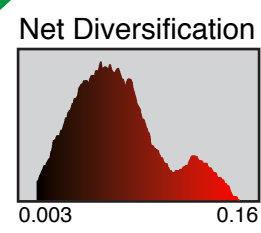



Net Diversification Rate

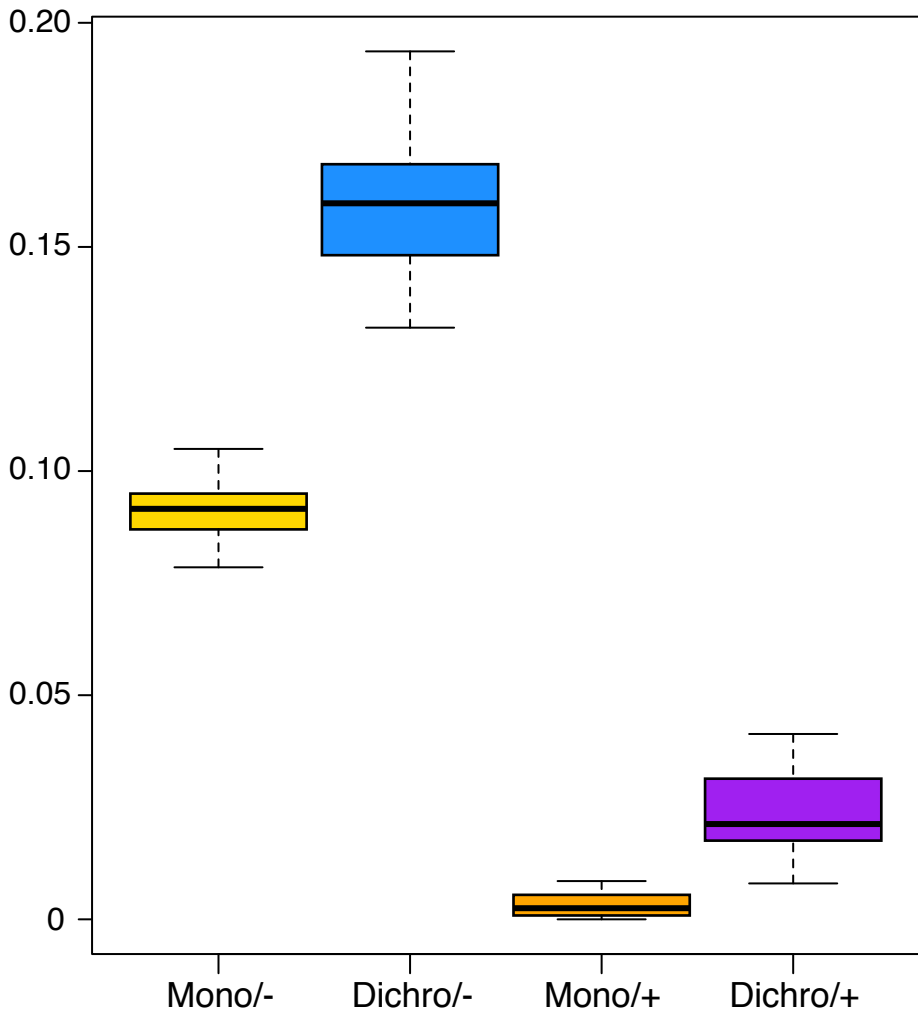

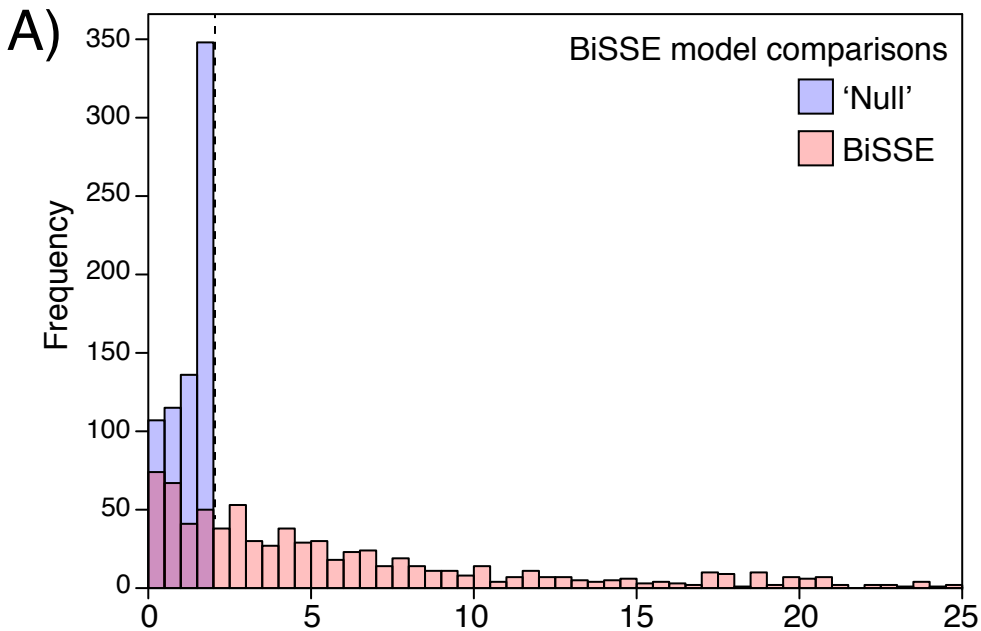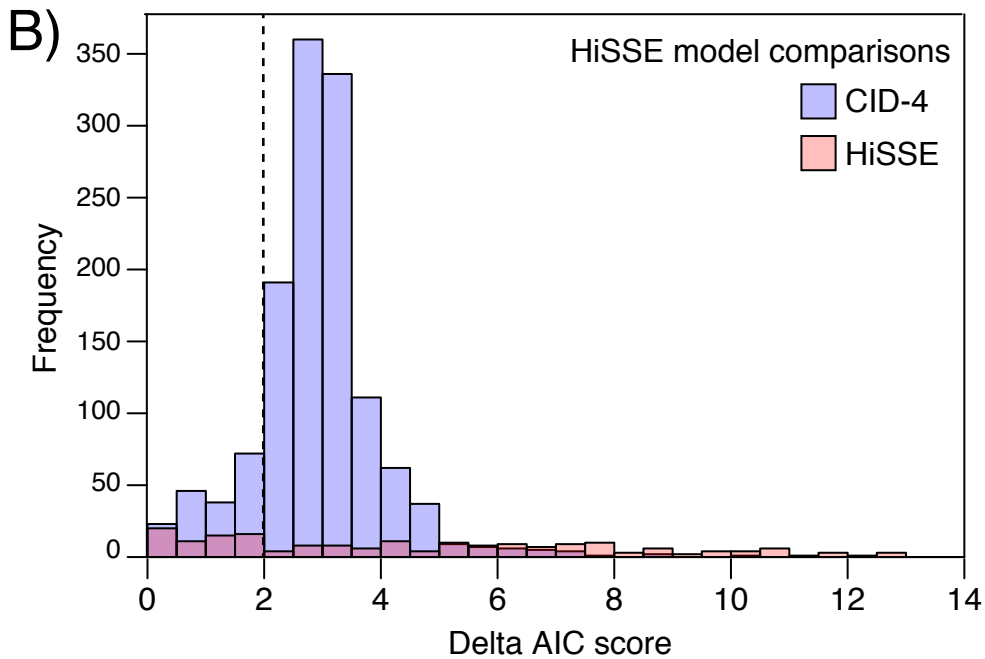

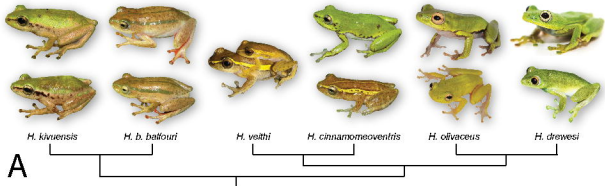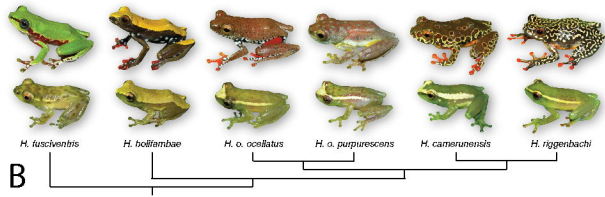

Source: http://biorxiv.org/content/10.1101/372250v1.full.pdf
